# Supplementary material for: White matter alterations in pediatric brainstem glioma: An national brain tumor registry of China study
Source: Frontiers journal article supplement (doi:10.3389/fnins.2022.986873), 2022-09-09
Supplement: Data_Sheet_1.pdf [file Data_Sheet_1.pdf]

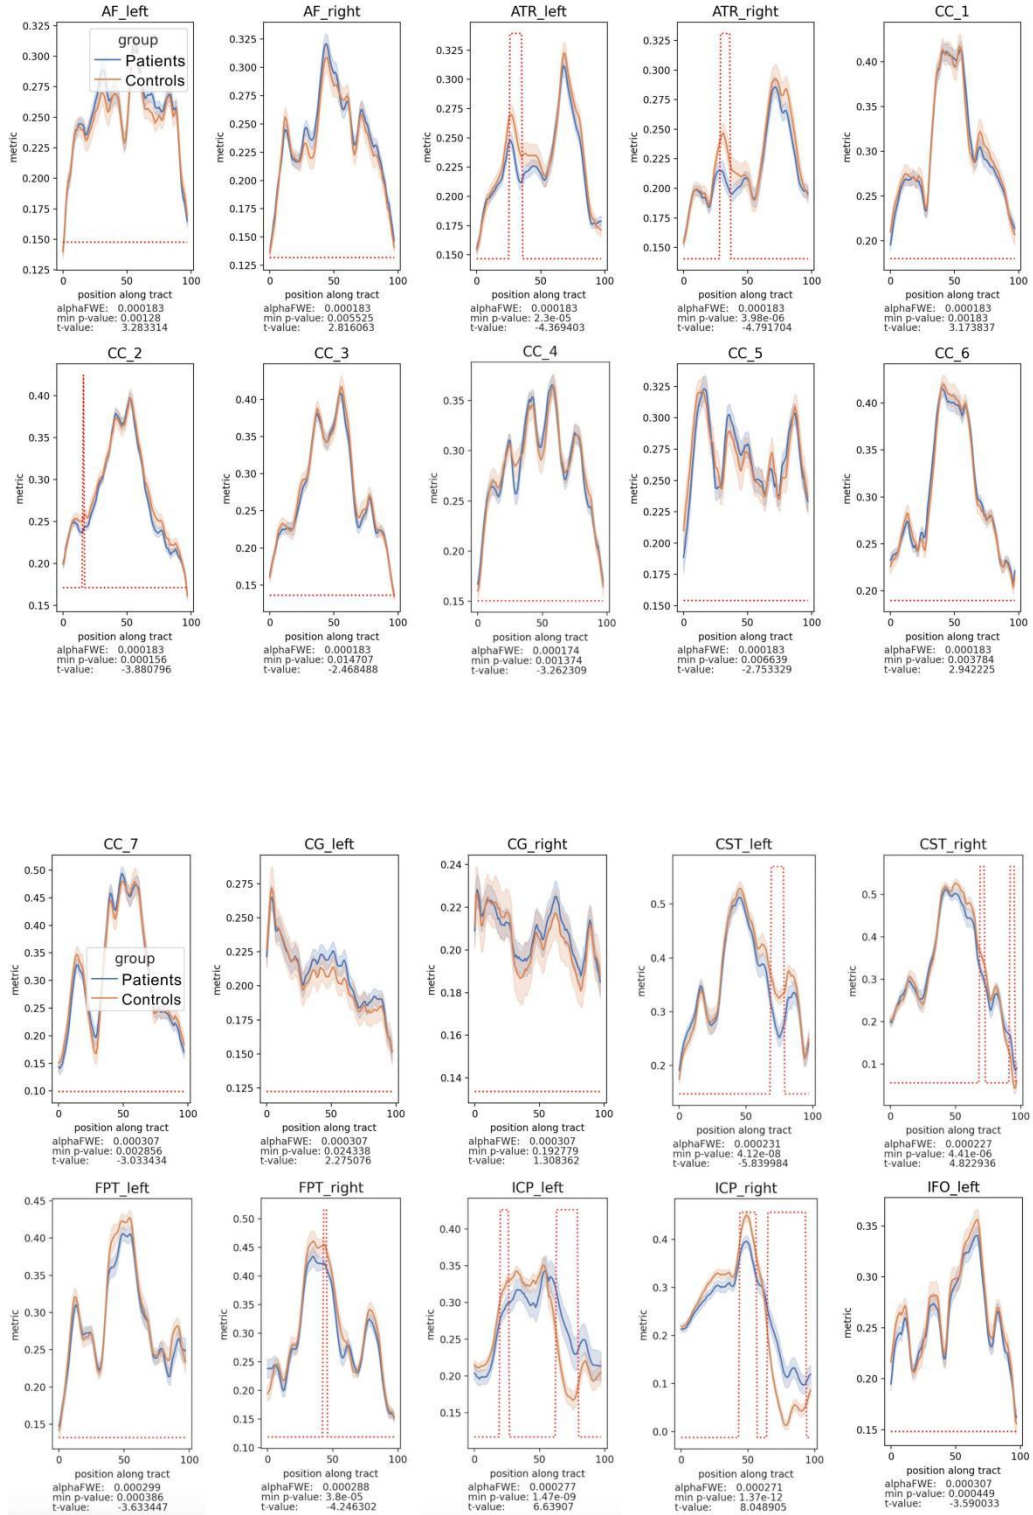

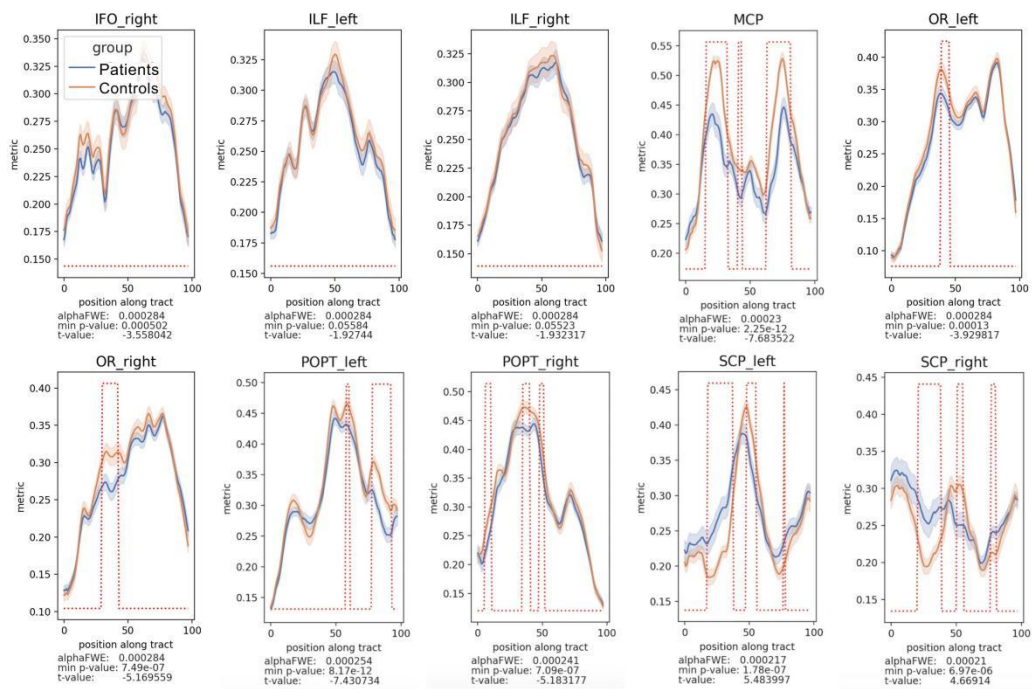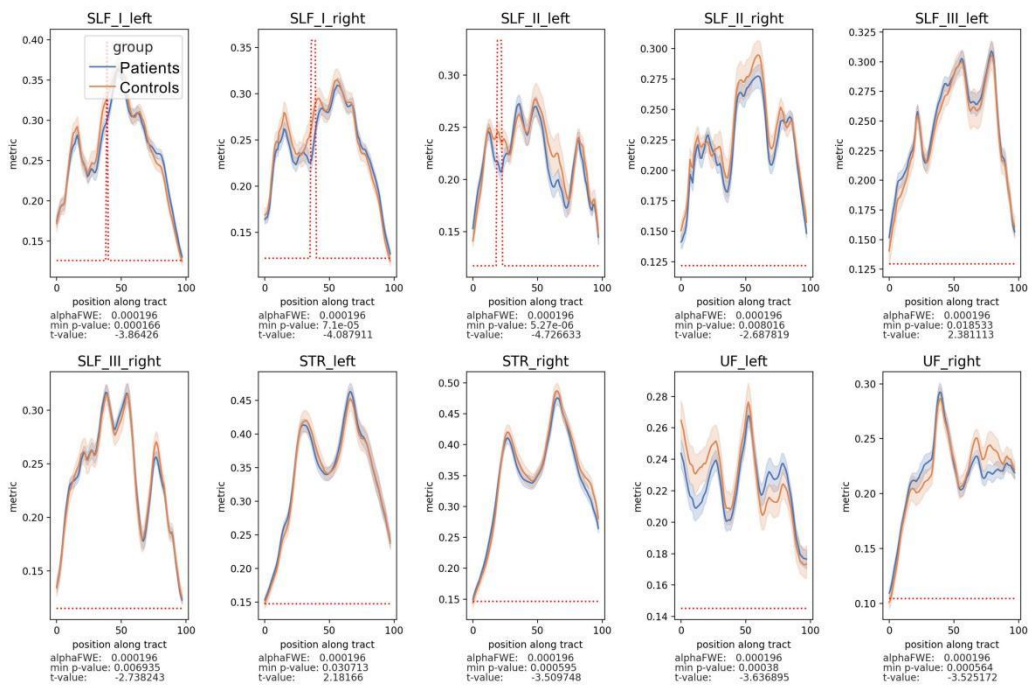

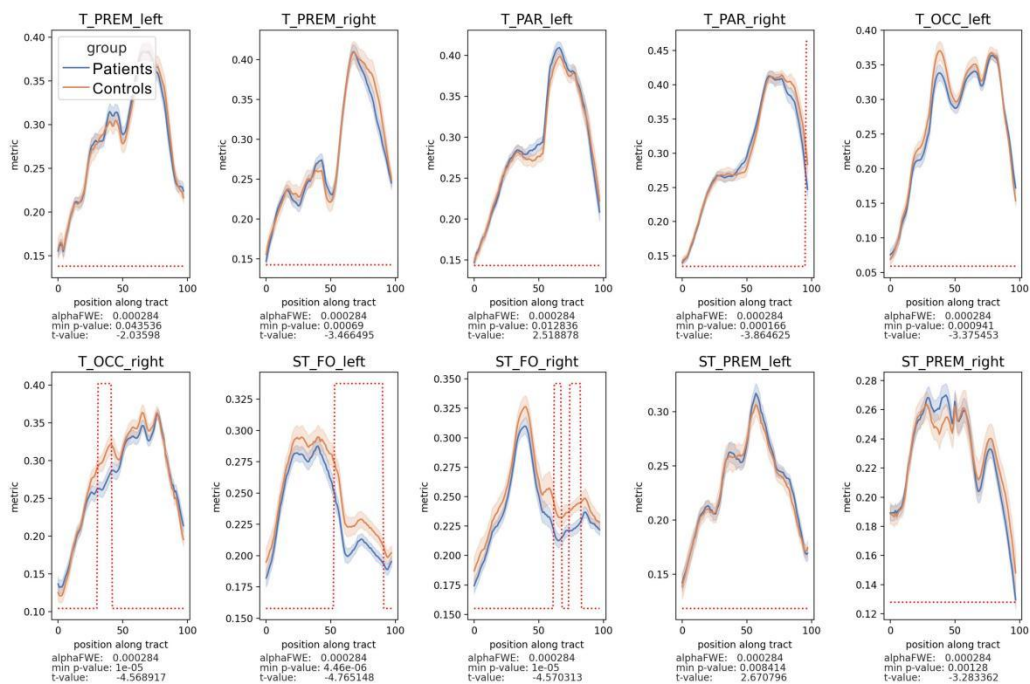

**Supplementary Figure 1.** Quantitative analysis of FA values of fifty white matter tracts in patients versus healthy controls.

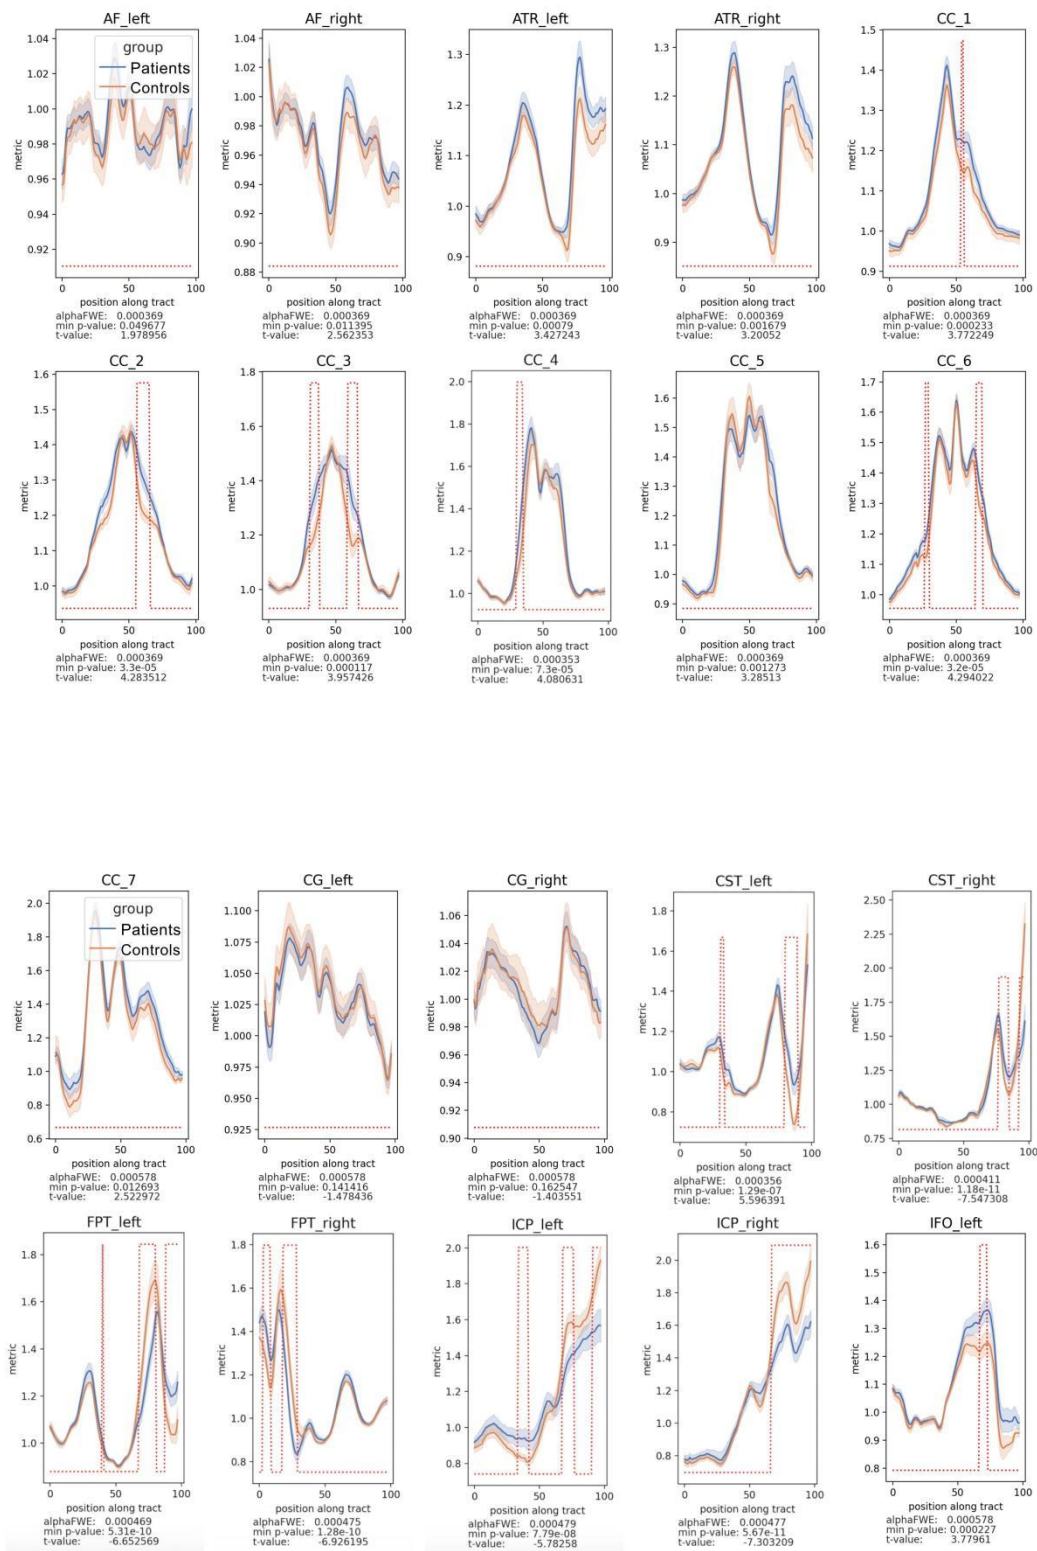



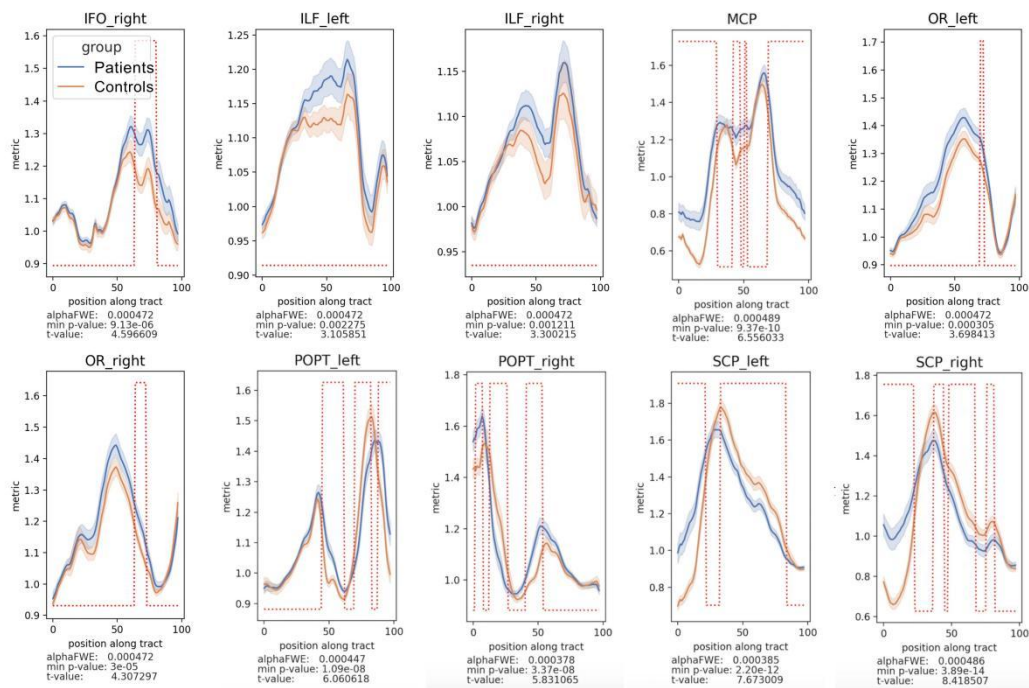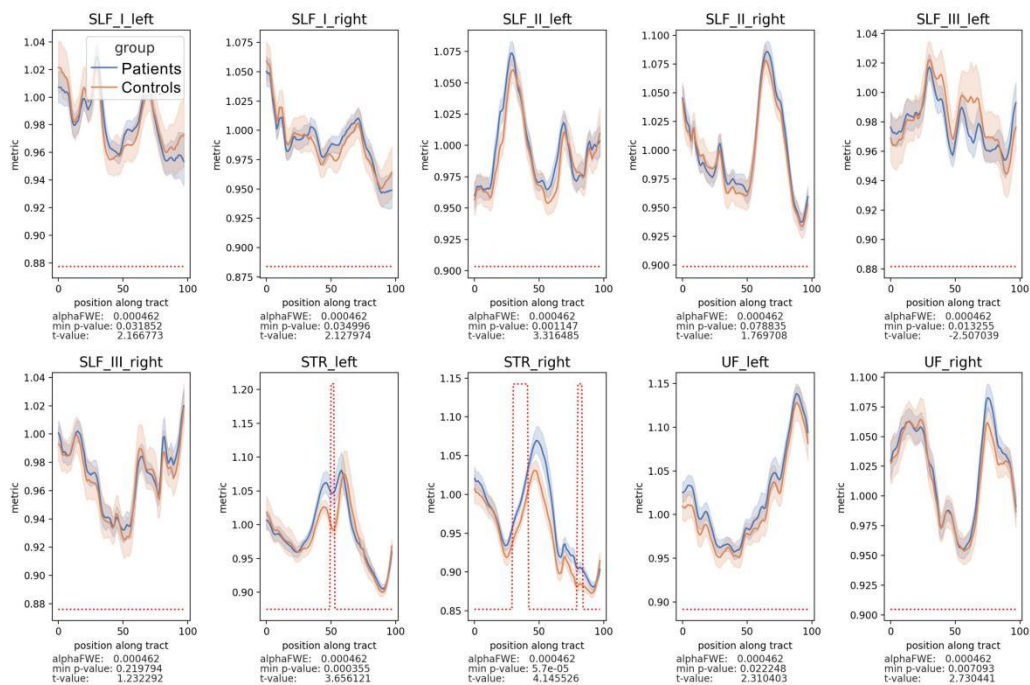

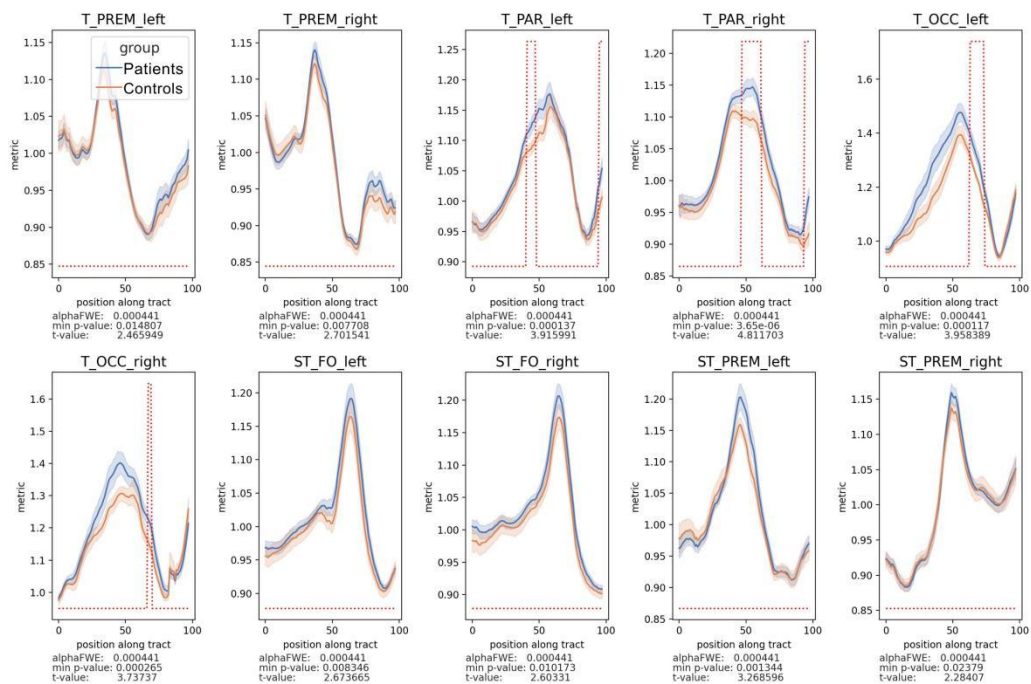

**Supplementary Figure 2.** Quantitative analysis of MD values of fifty white matter tracts in patients versus healthy controls.

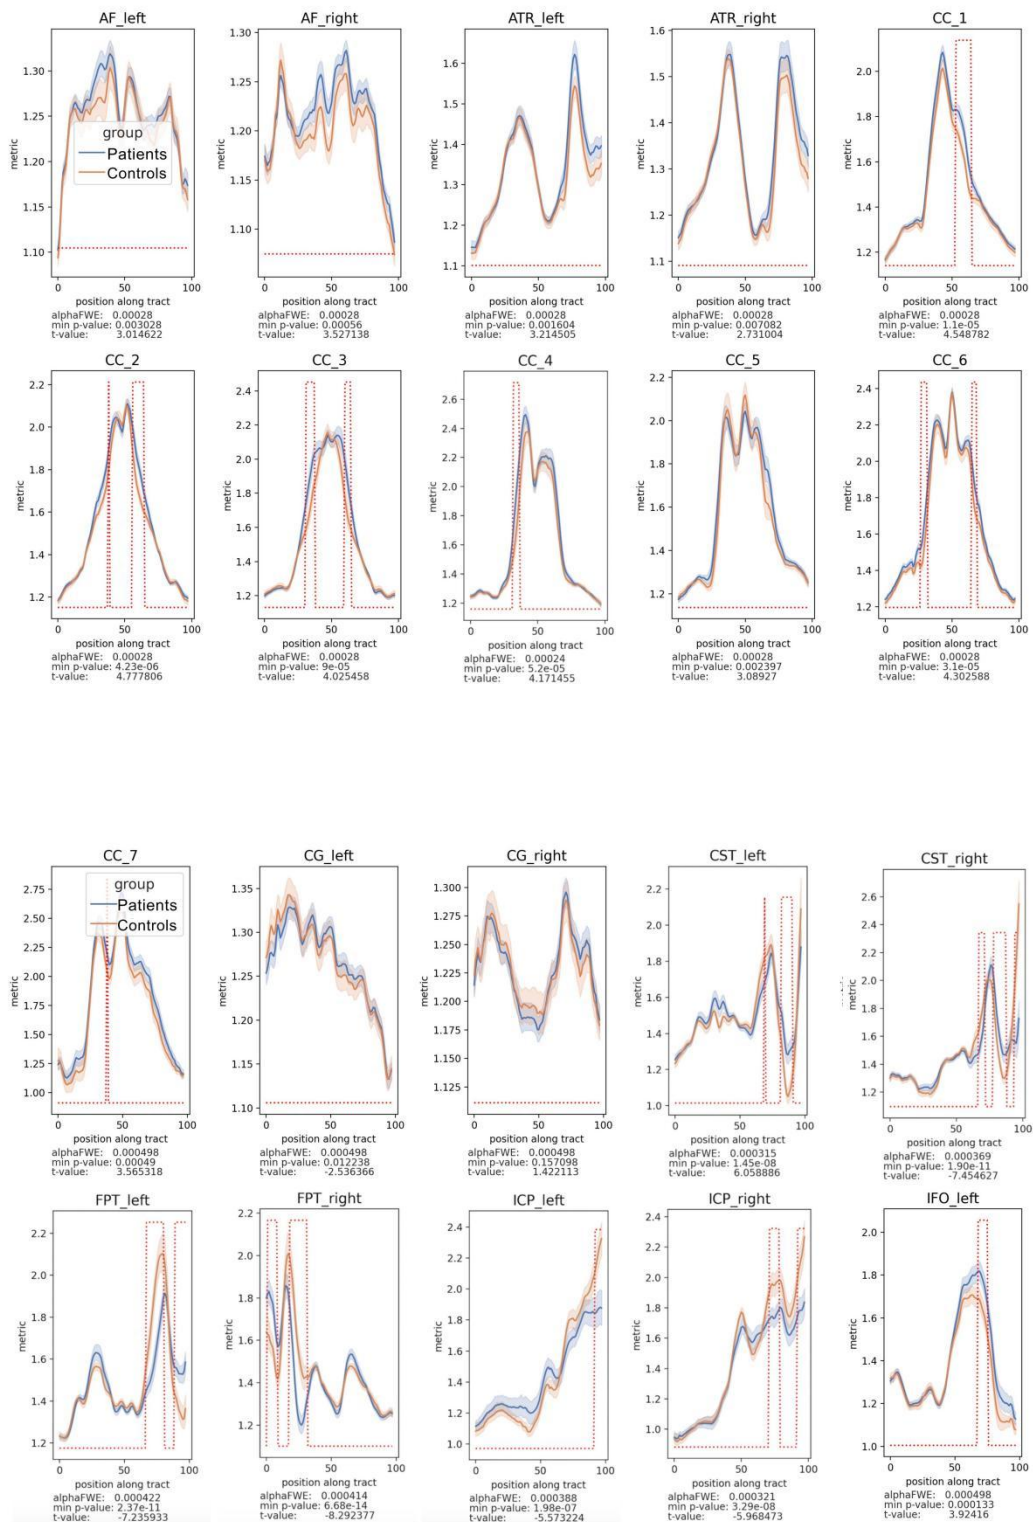

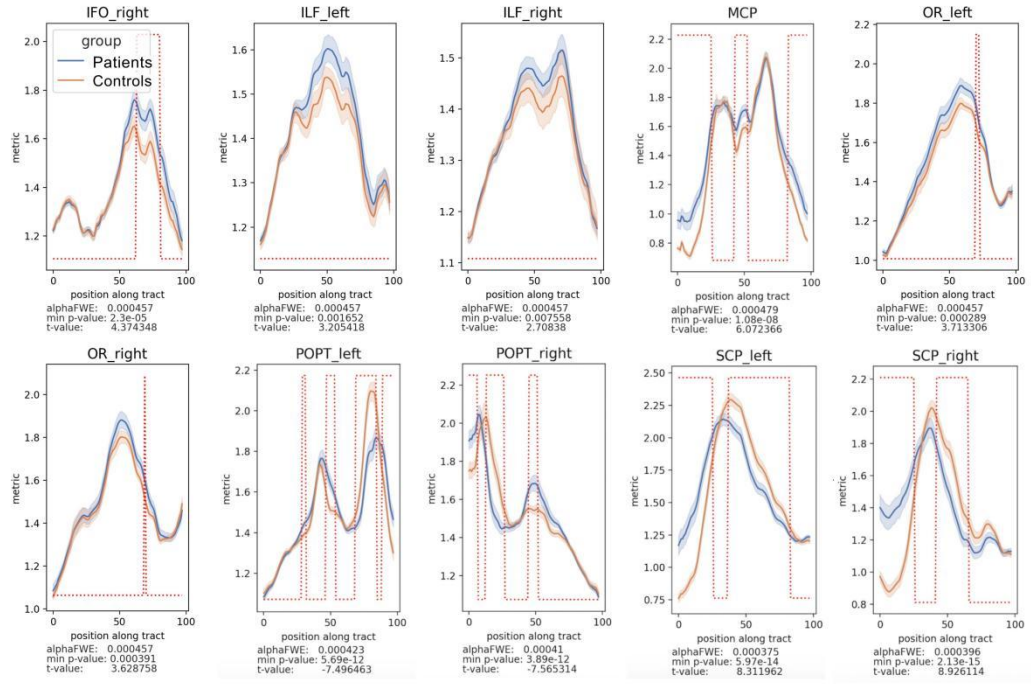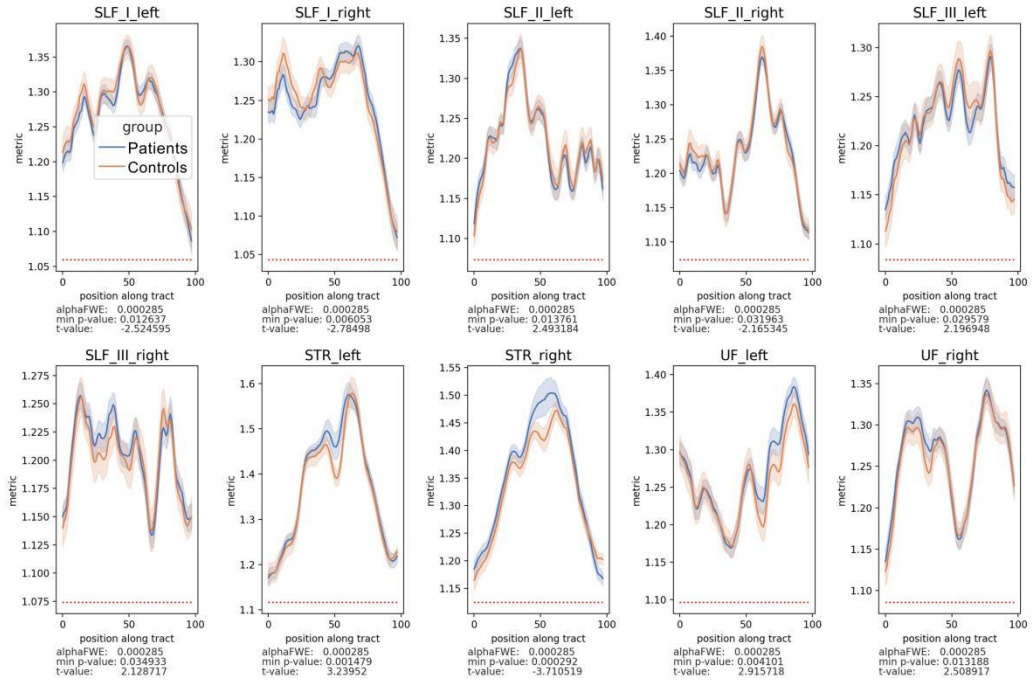



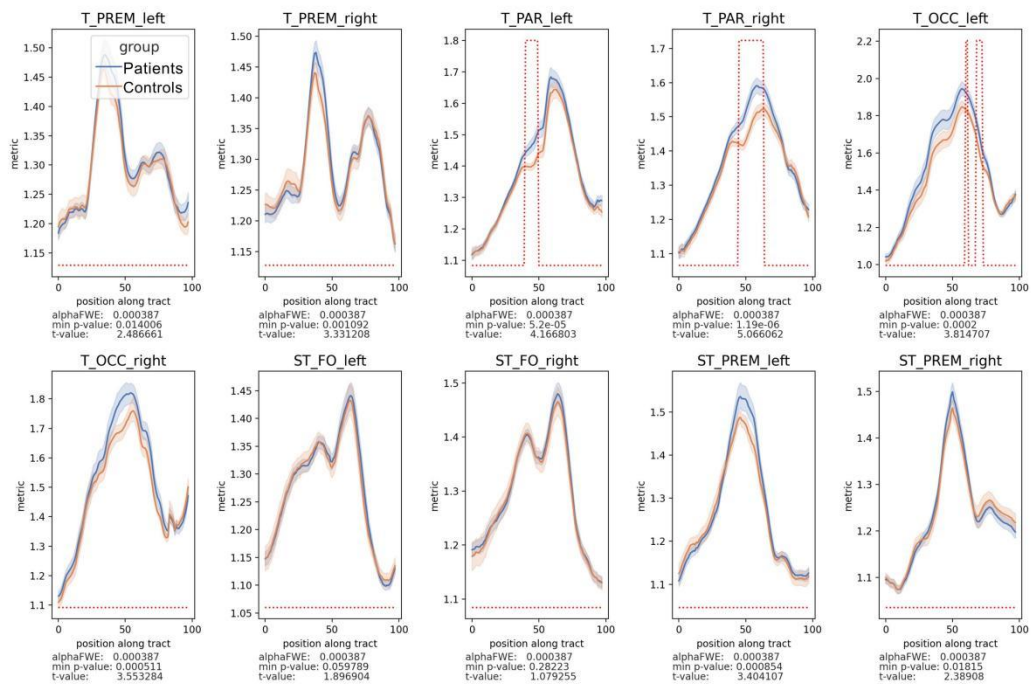

**Supplementary Figure 3.** Quantitative analysis of AD values of fifty white matter tracts in patients versus healthy controls.

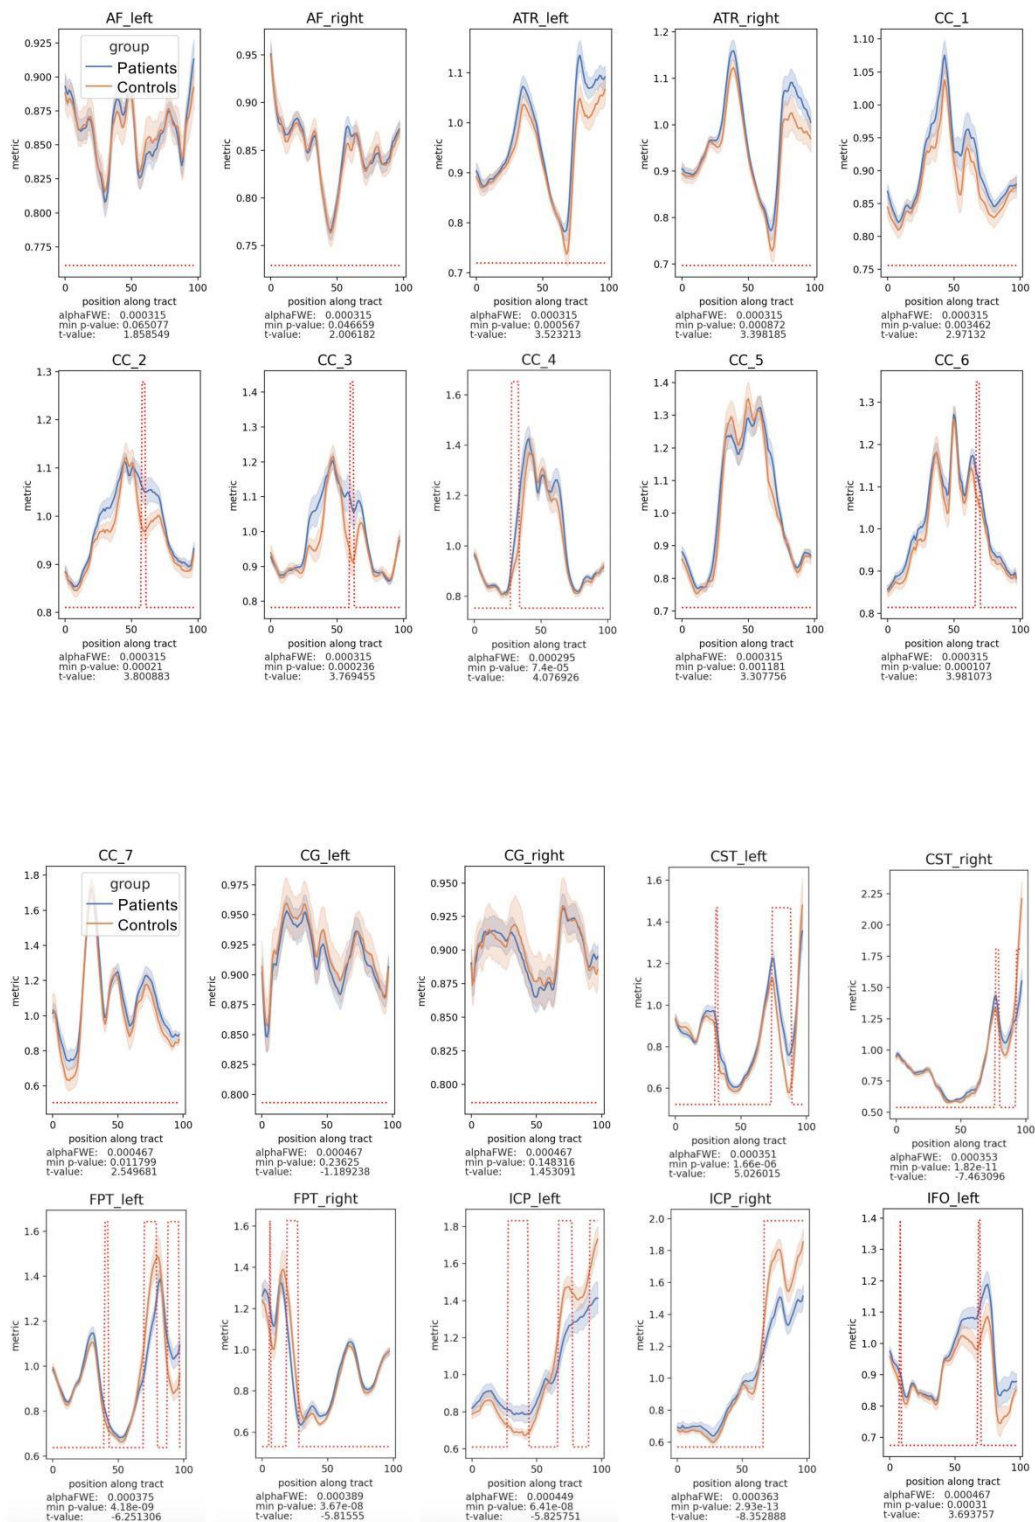

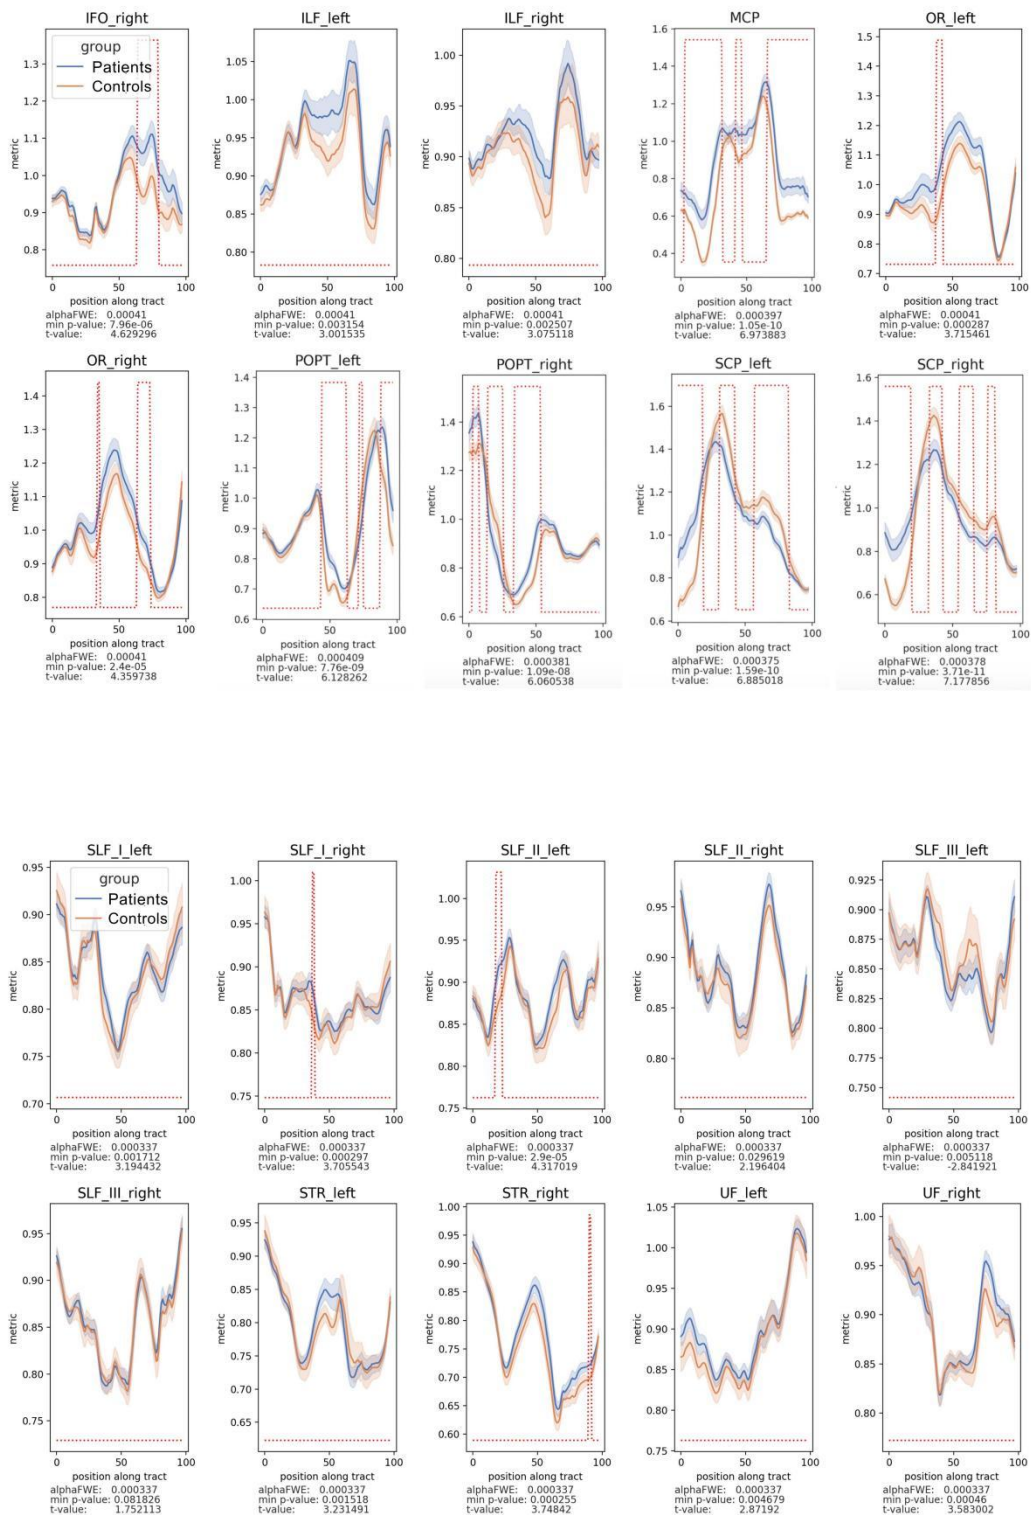

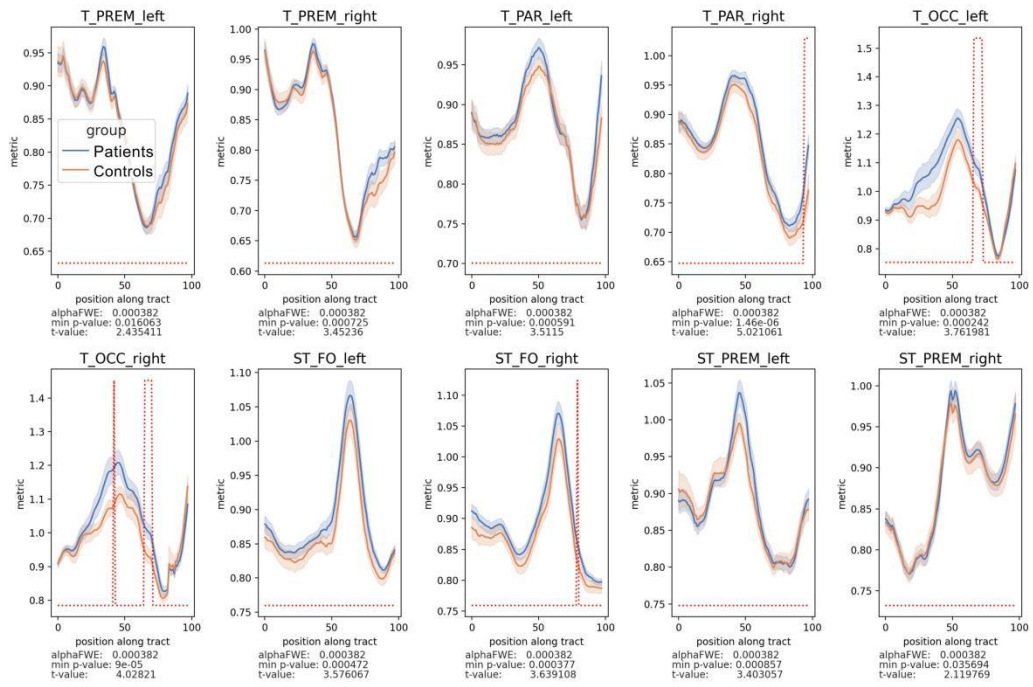

**Supplementary Figure 4.** Quantitative analysis of RD values of fifty white matter tracts in patients versus healthy controls.



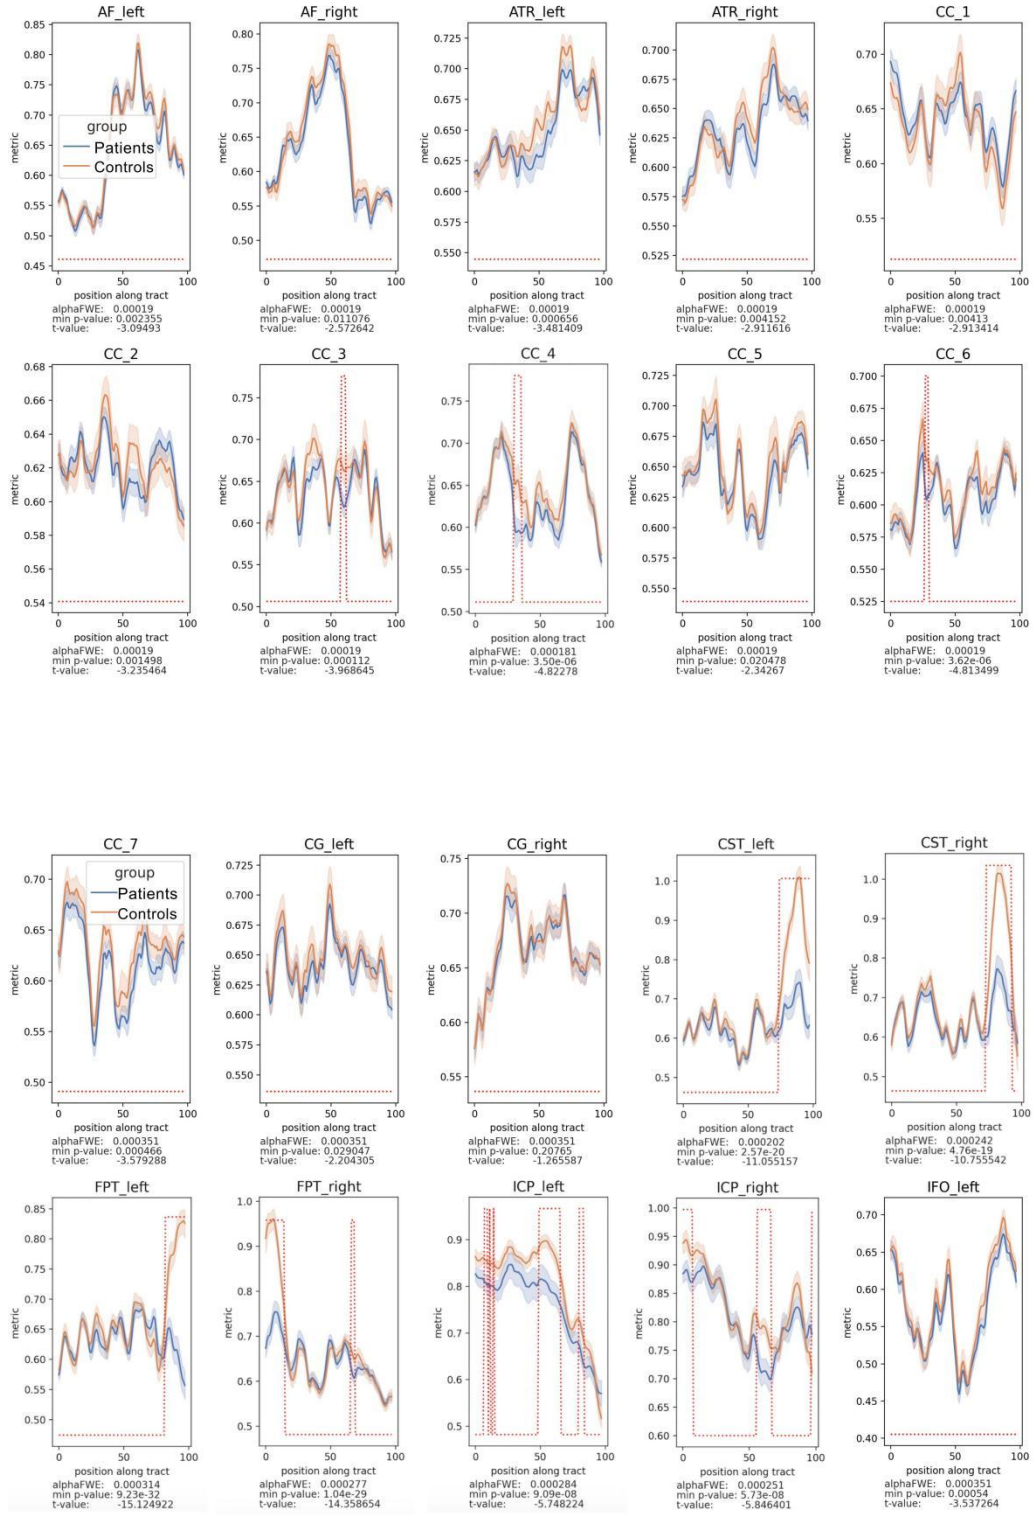

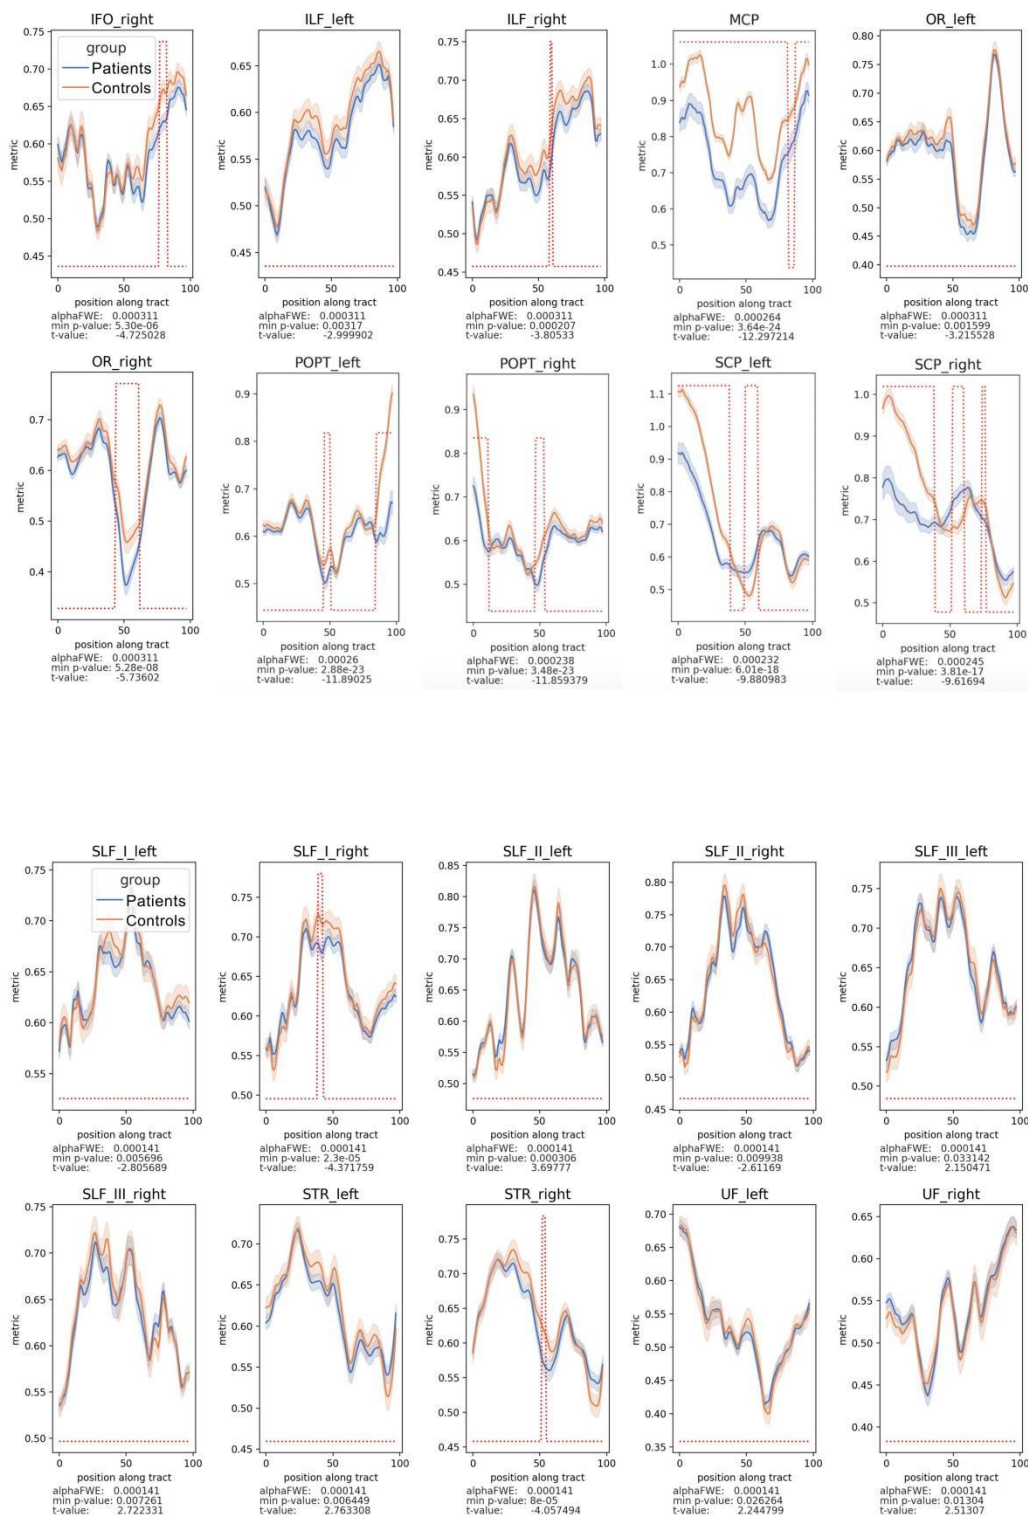

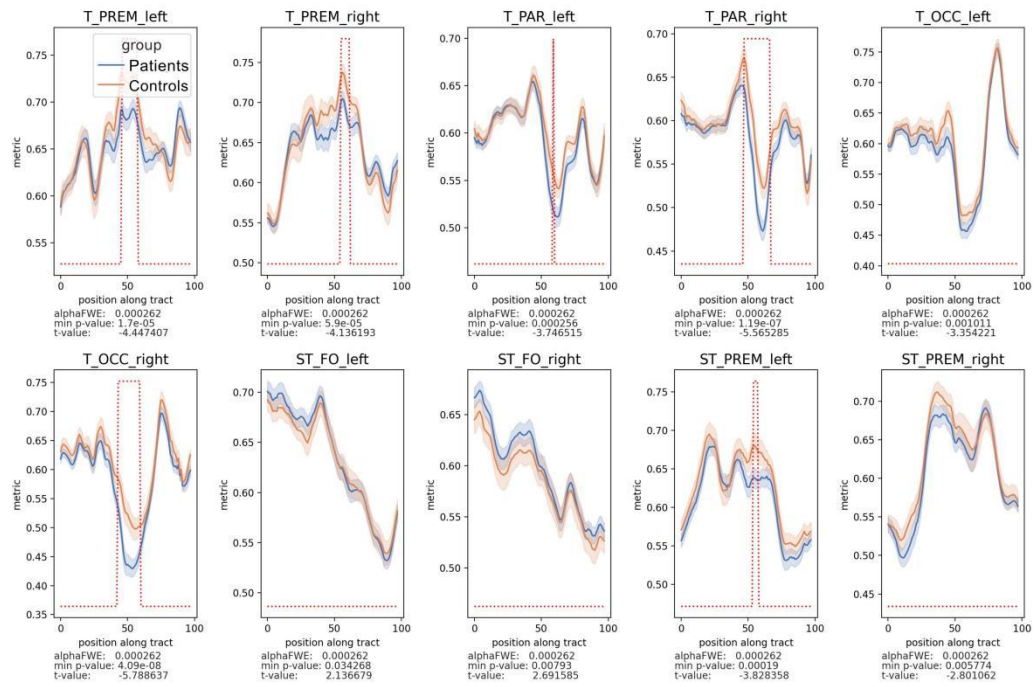

**Supplementary Figure 5.** Quantitative analysis of AK values of fifty white matter tracts in patients versus healthy controls.

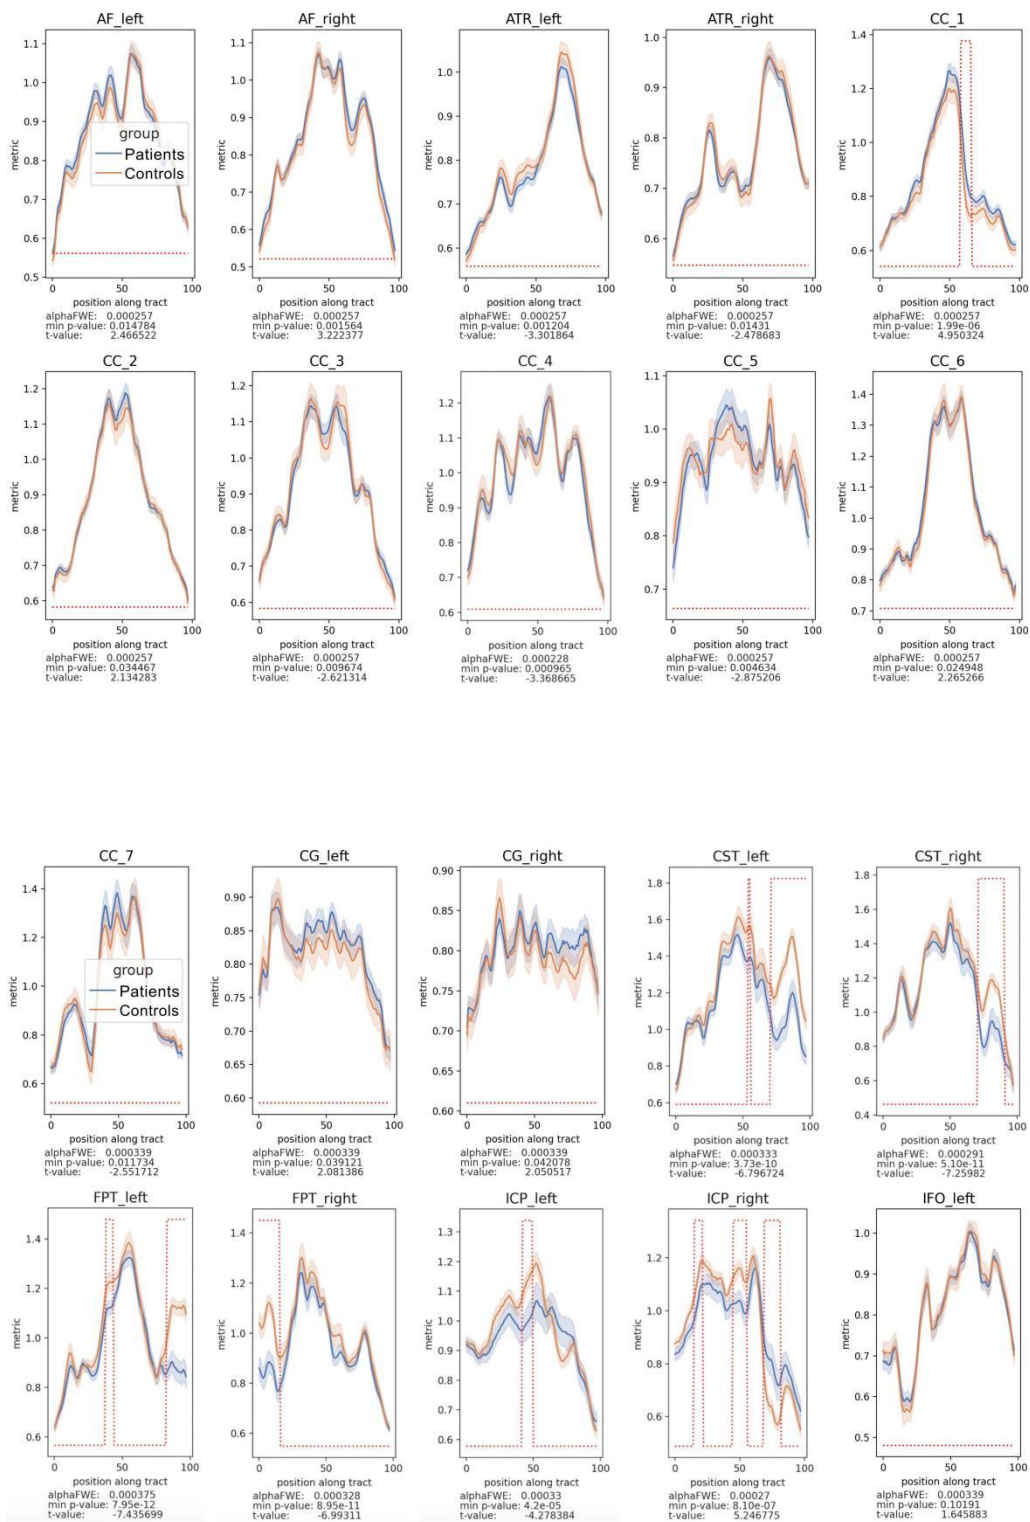



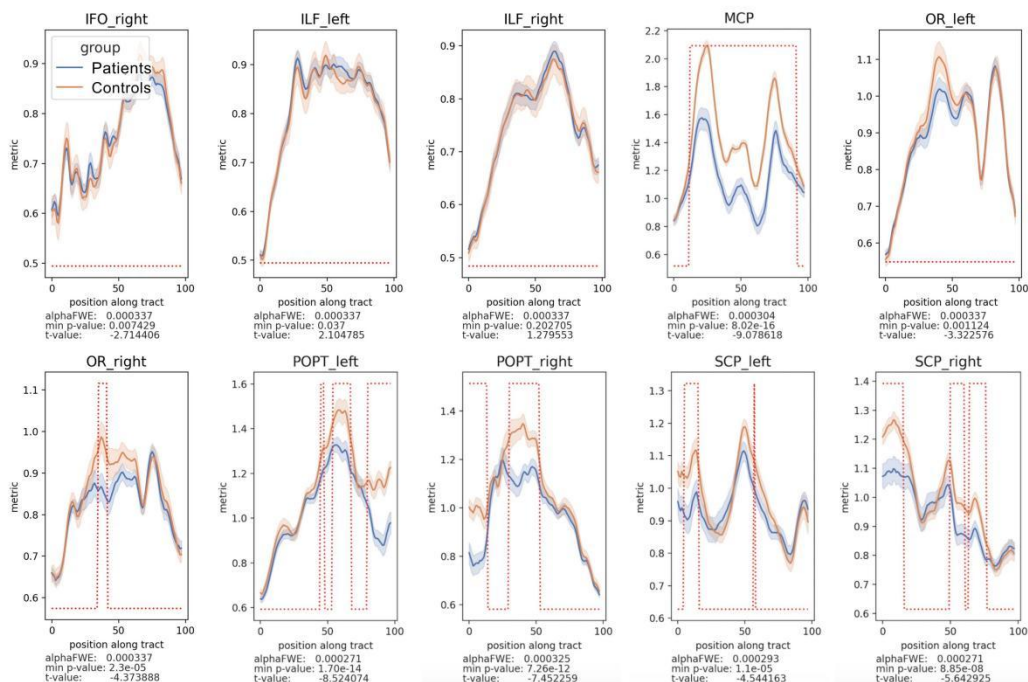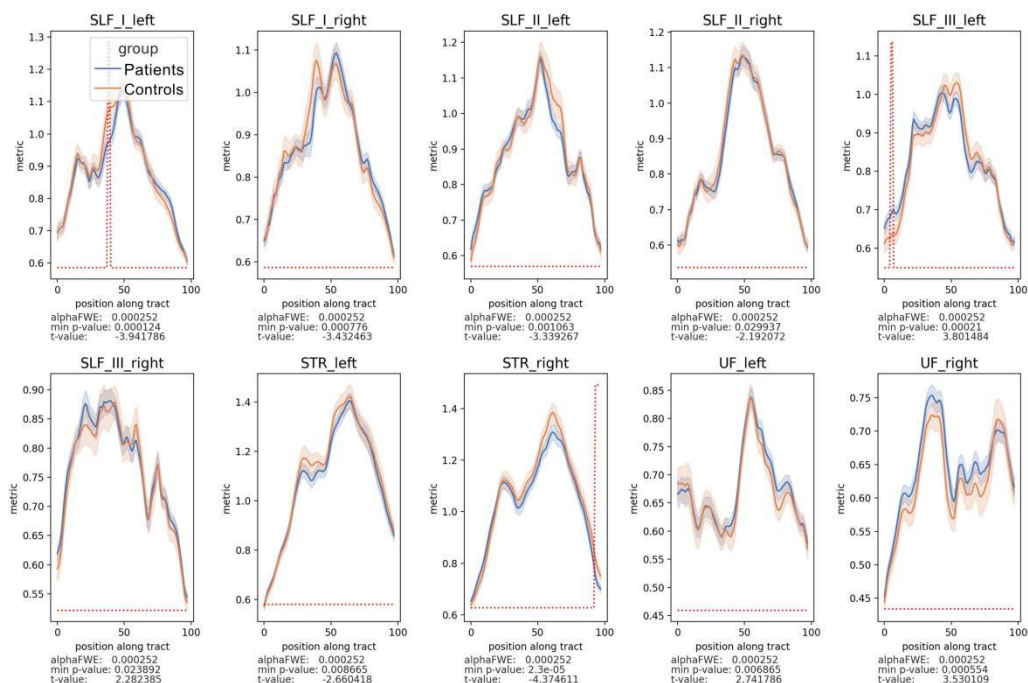

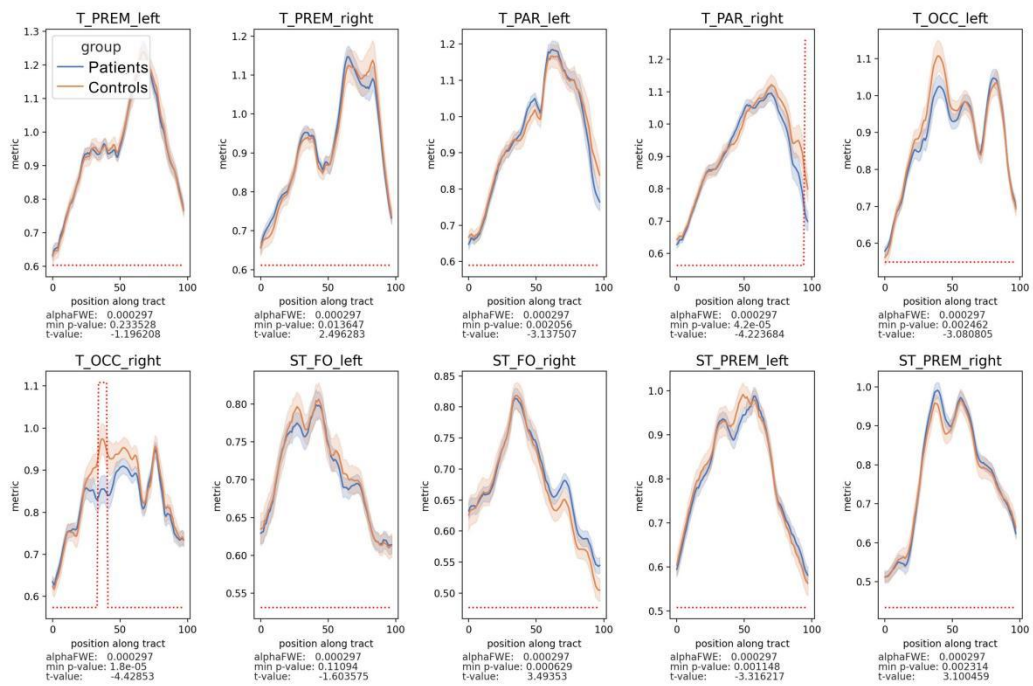

**Supplementary Figure 6.** Quantitative analysis of RK values of fifty white matter tracts in patients versus healthy controls.

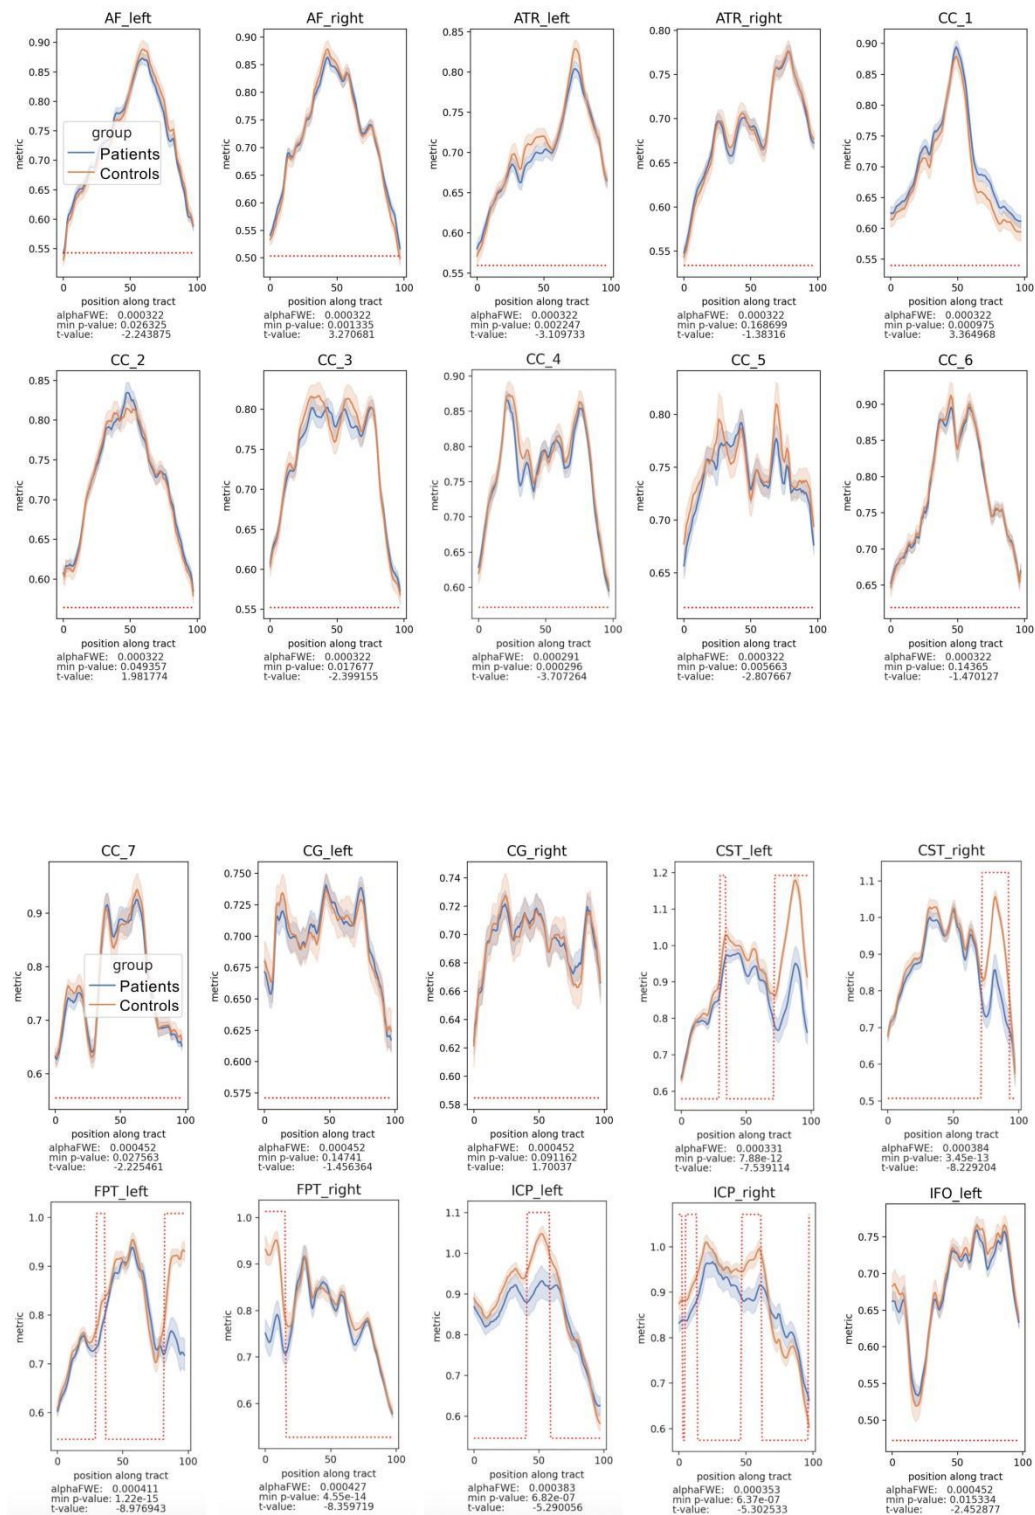

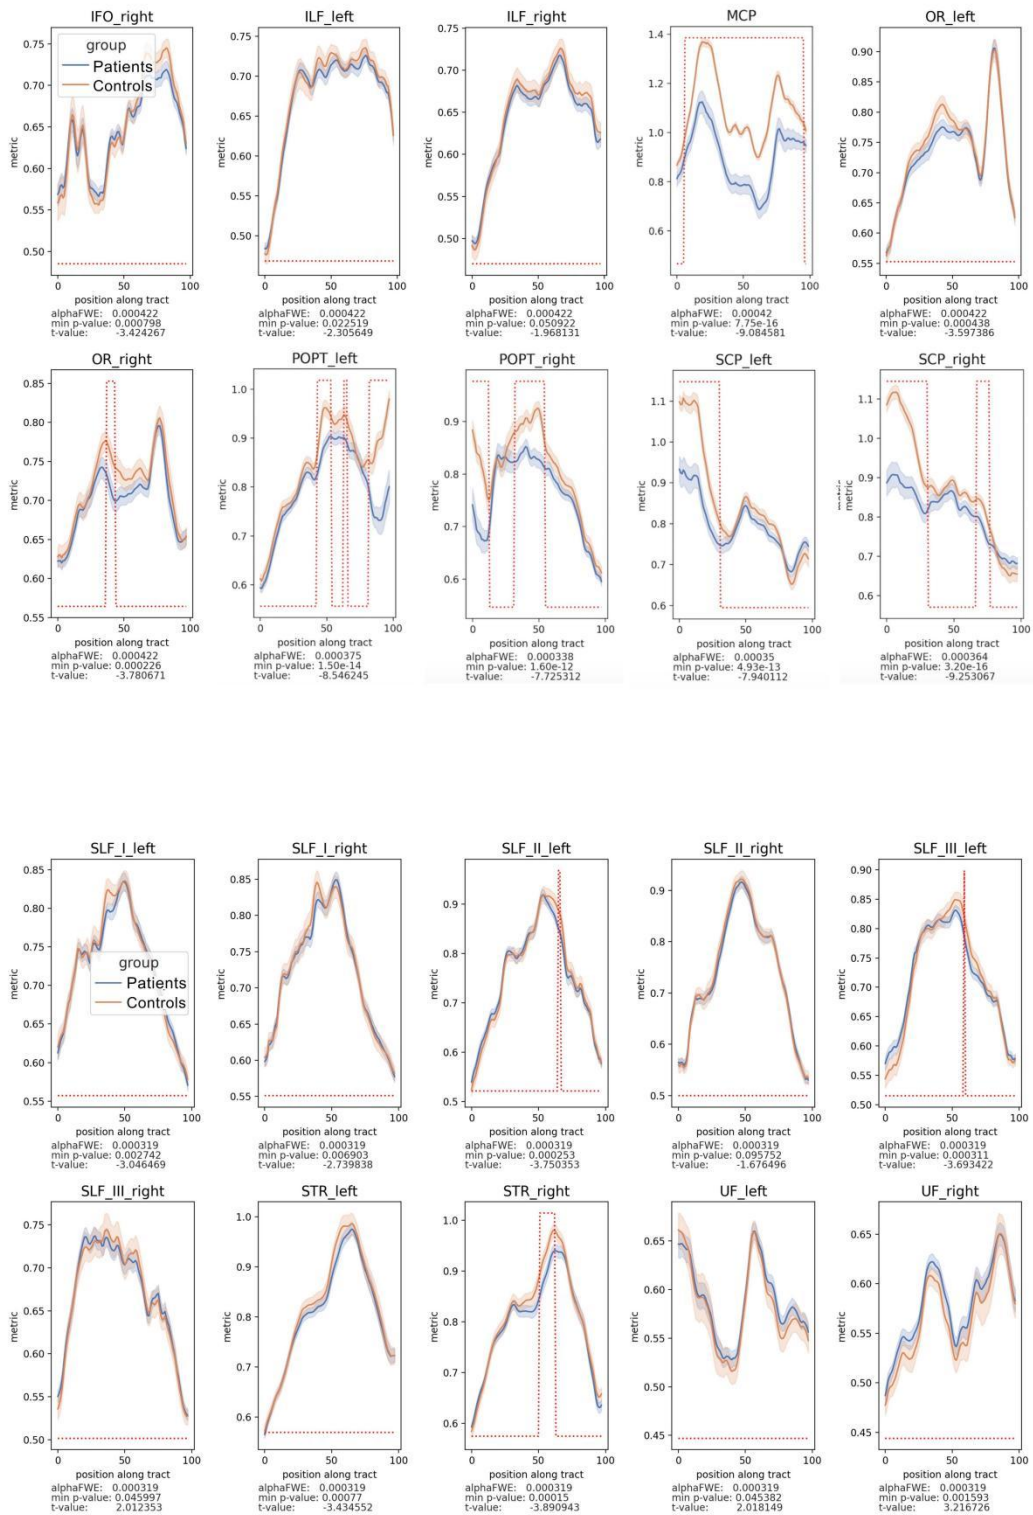



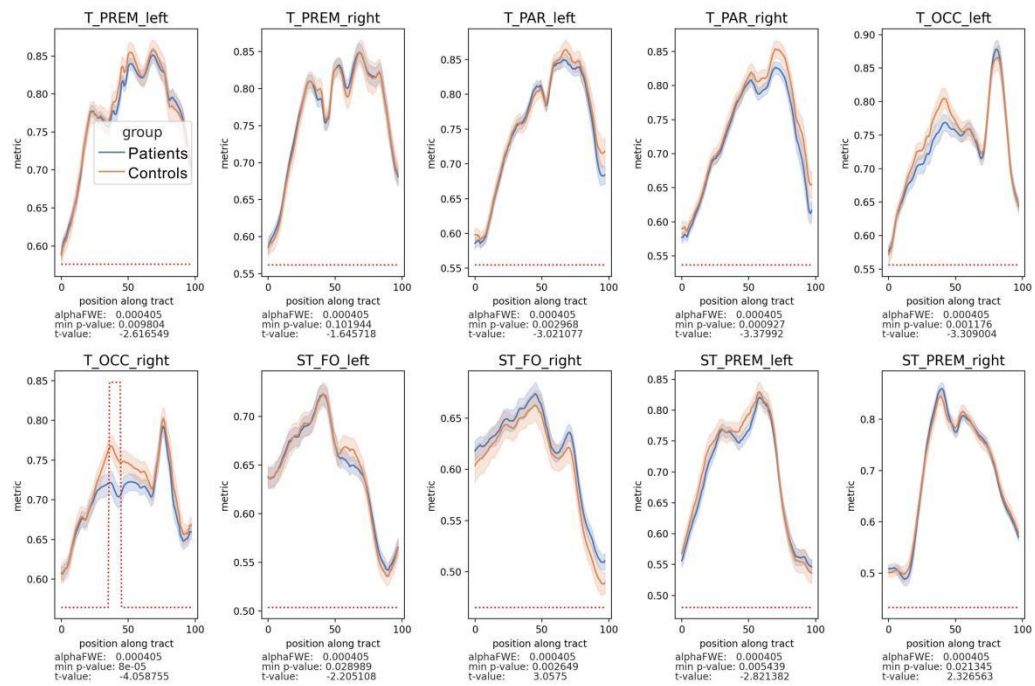

**Supplementary Figure 7.** Quantitative analysis of MK values of fifty white matter tracts in patients versus healthy controls.

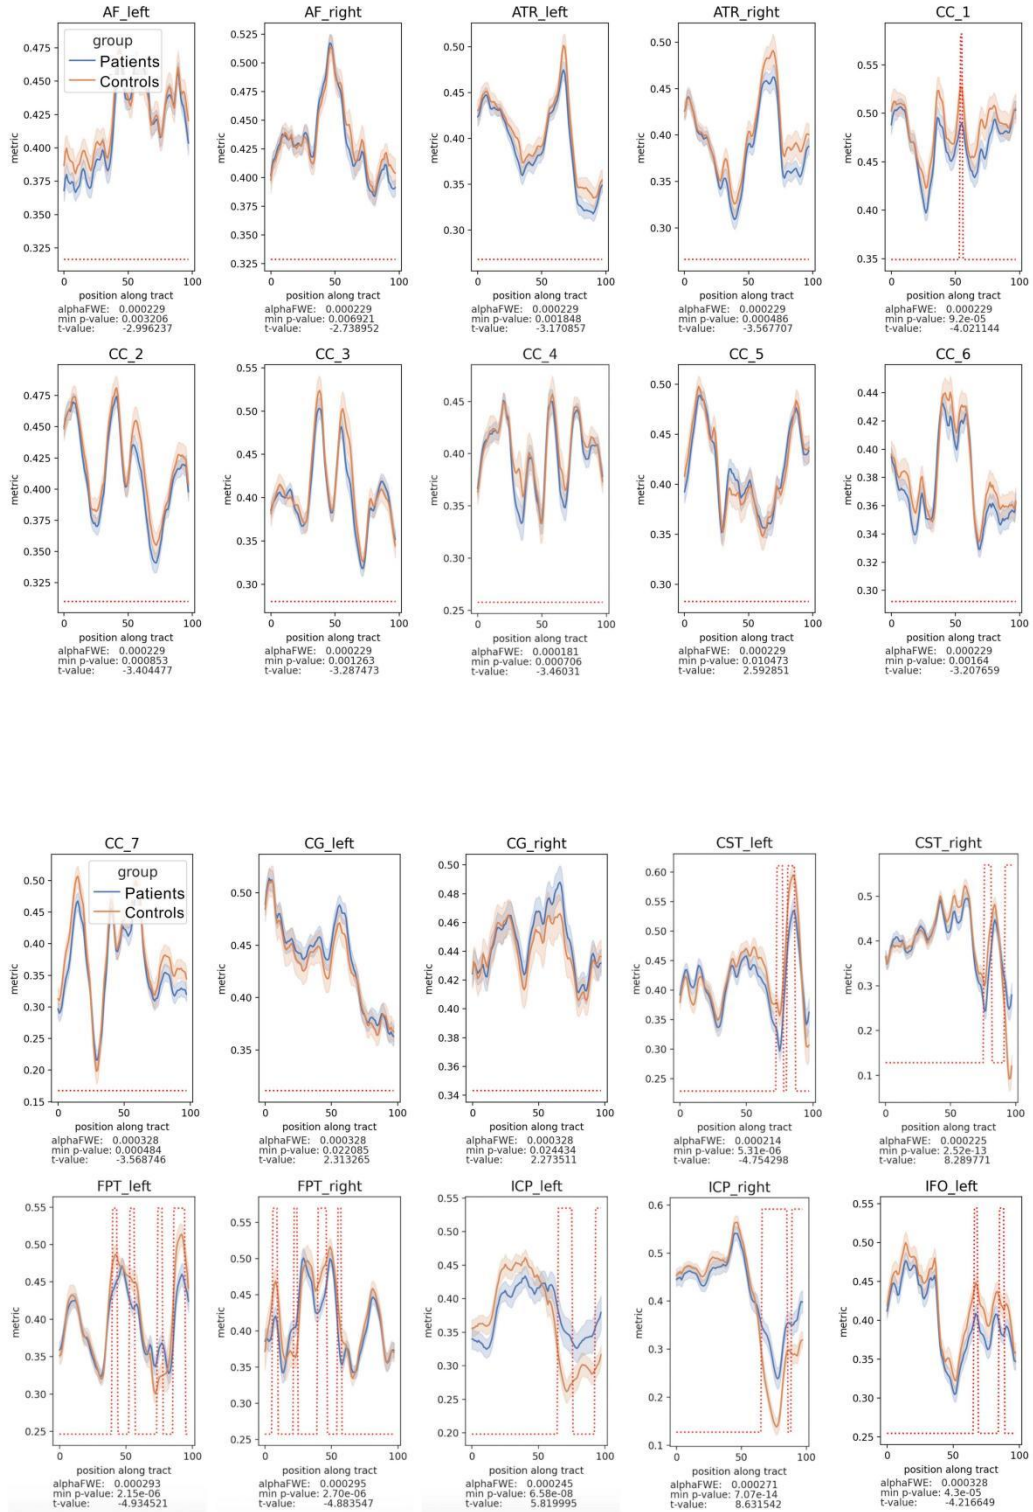

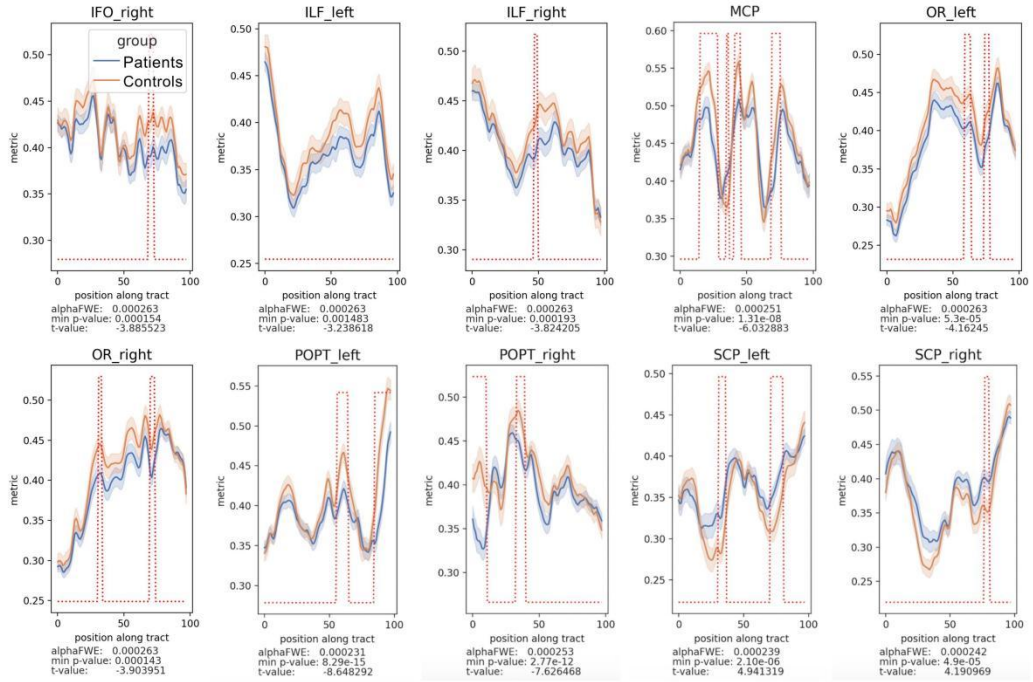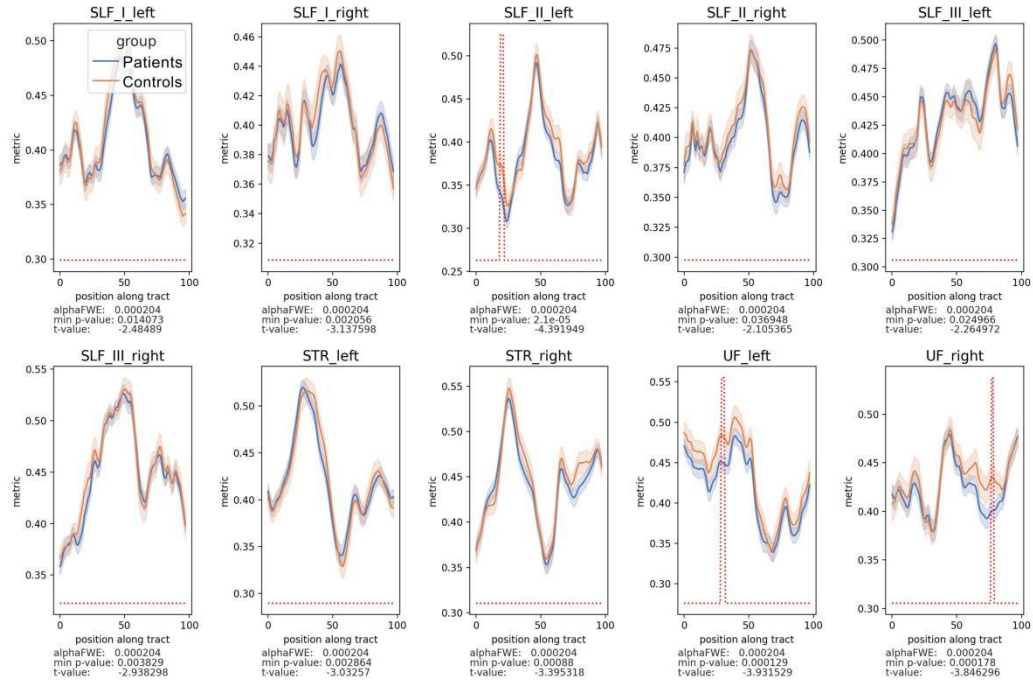

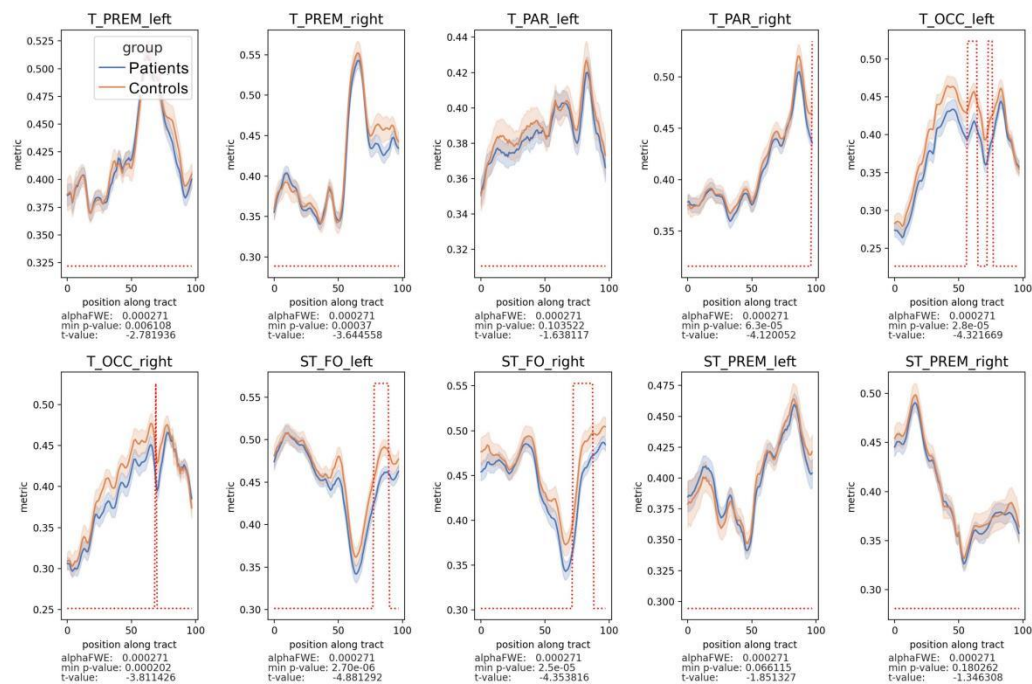

**Supplementary Figure 8.** Quantitative analysis of Fak values of fifty white matter tracts in patients versus healthy controls.



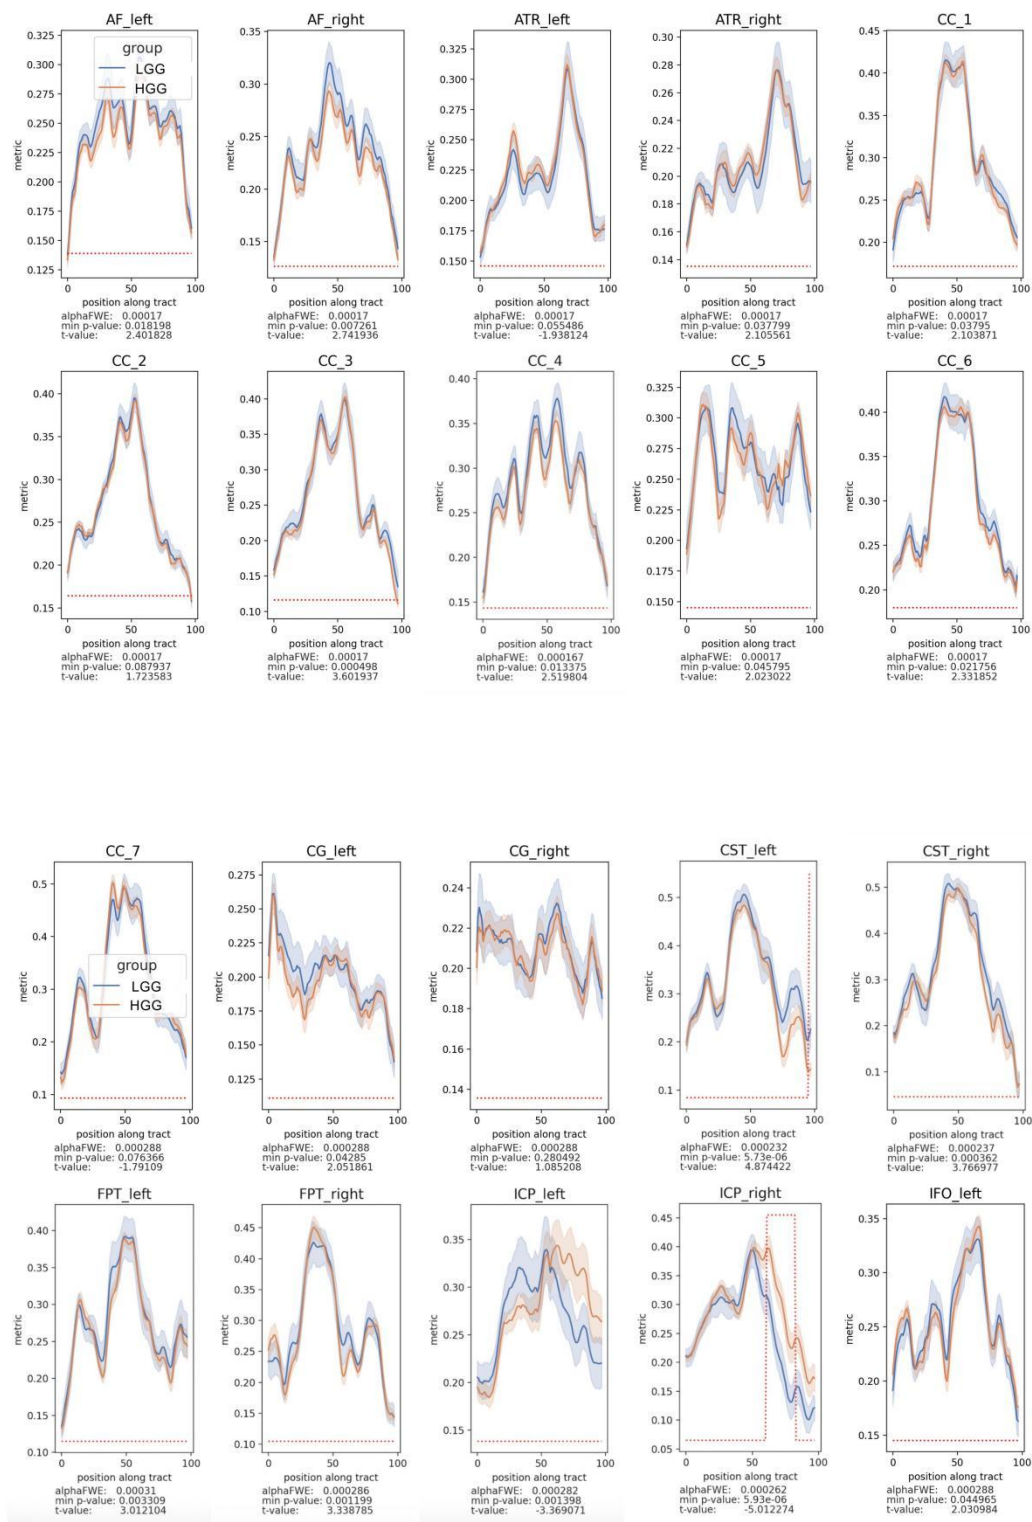

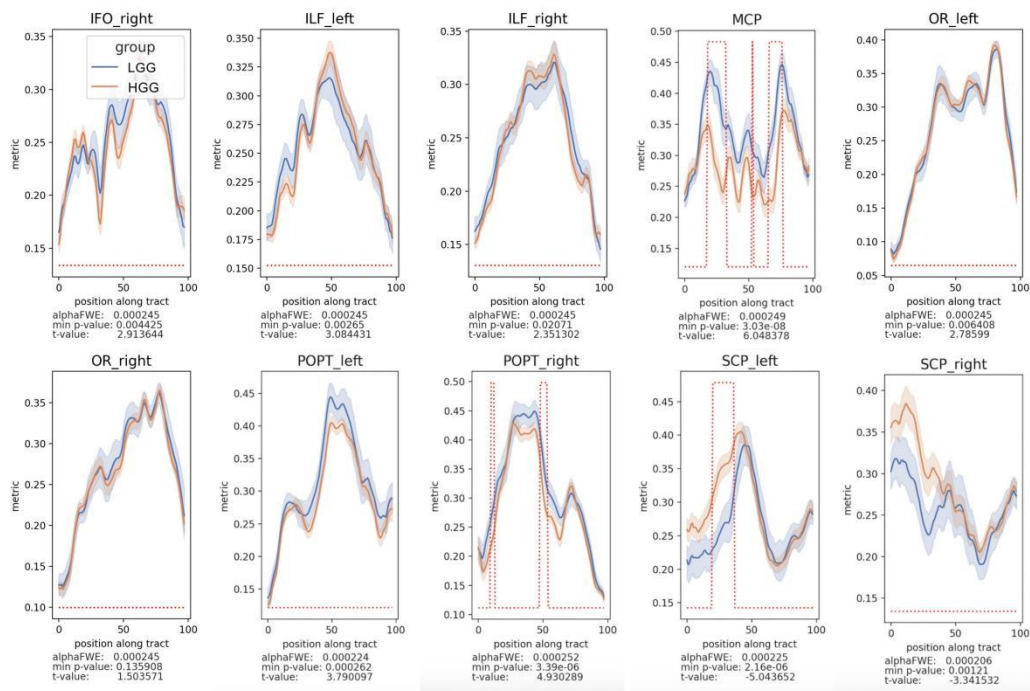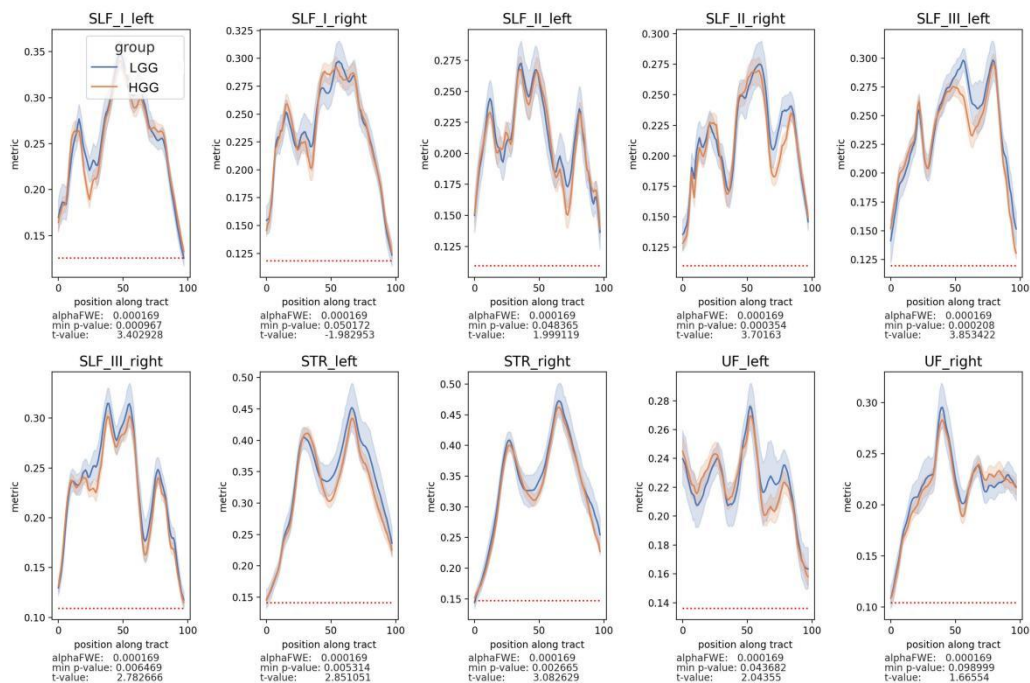

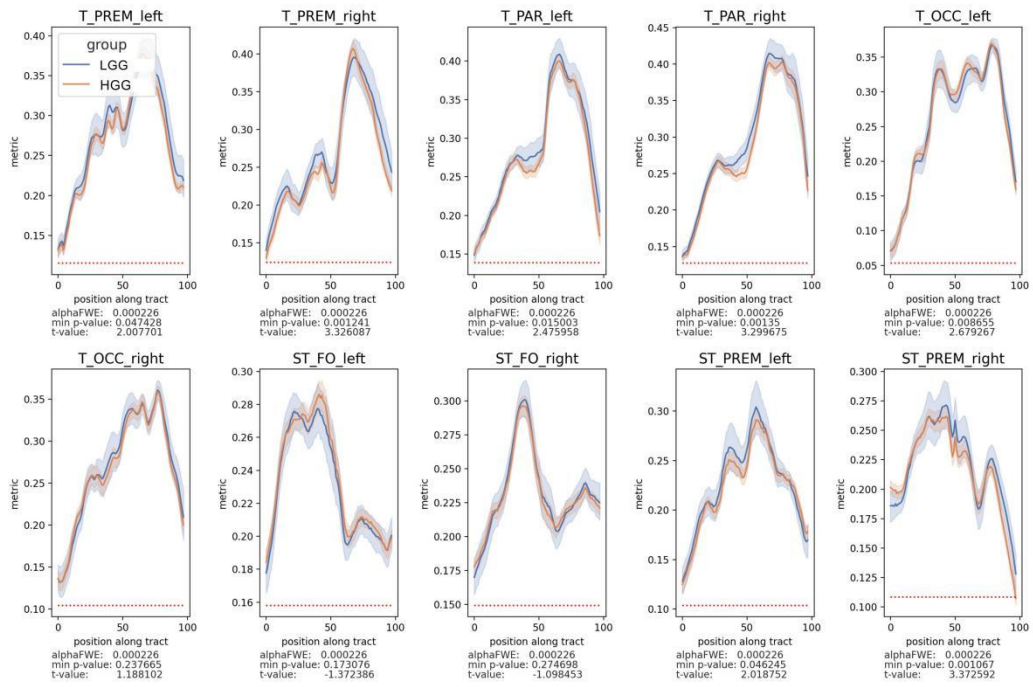

**Supplementary Figure 9.** Quantitative analysis of FA values of fifty white matter tracts in patients with LGG versus patients with HGG.

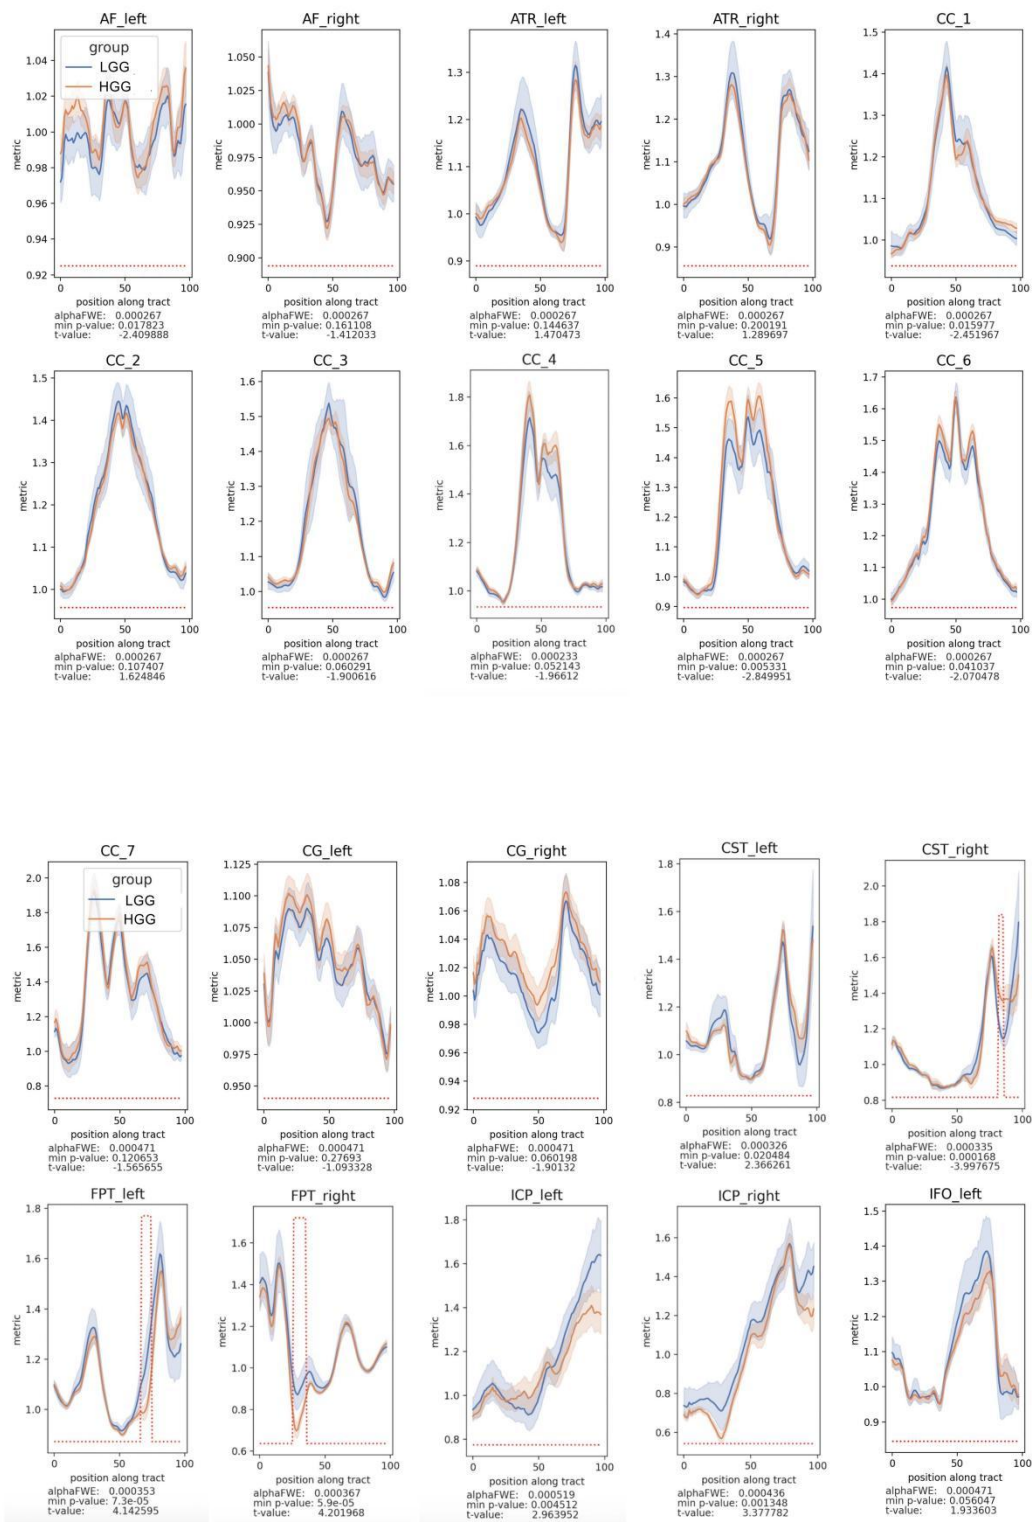



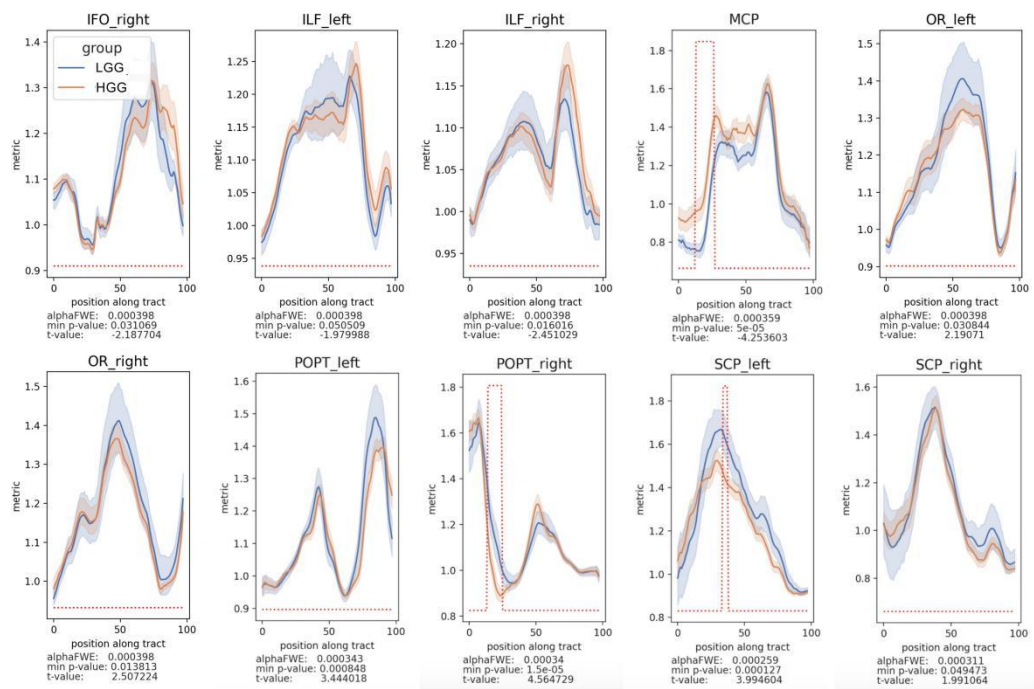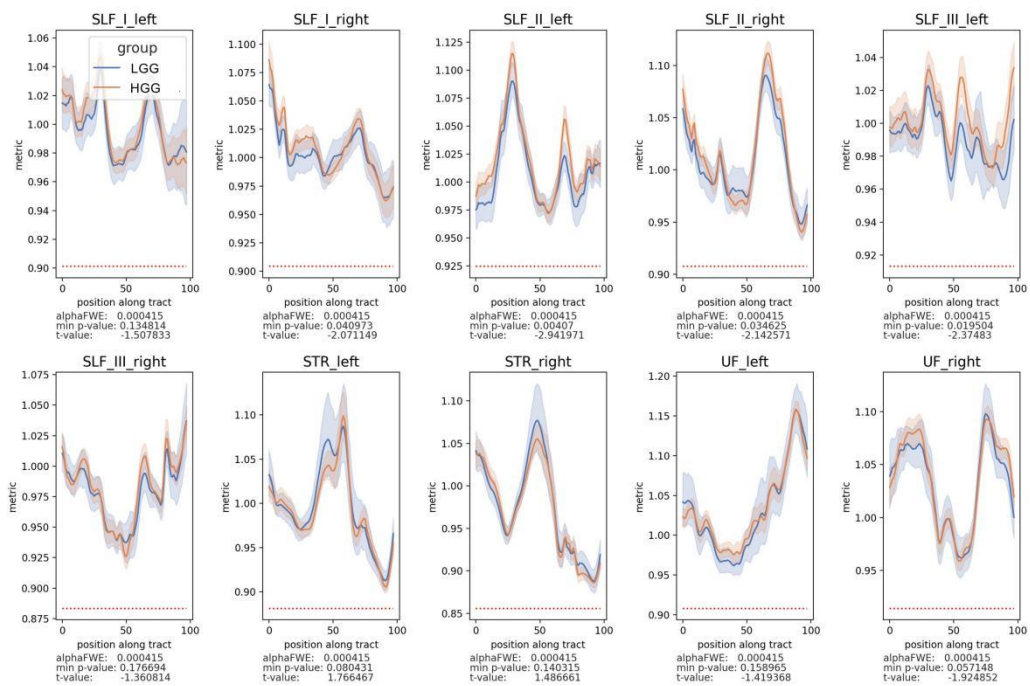

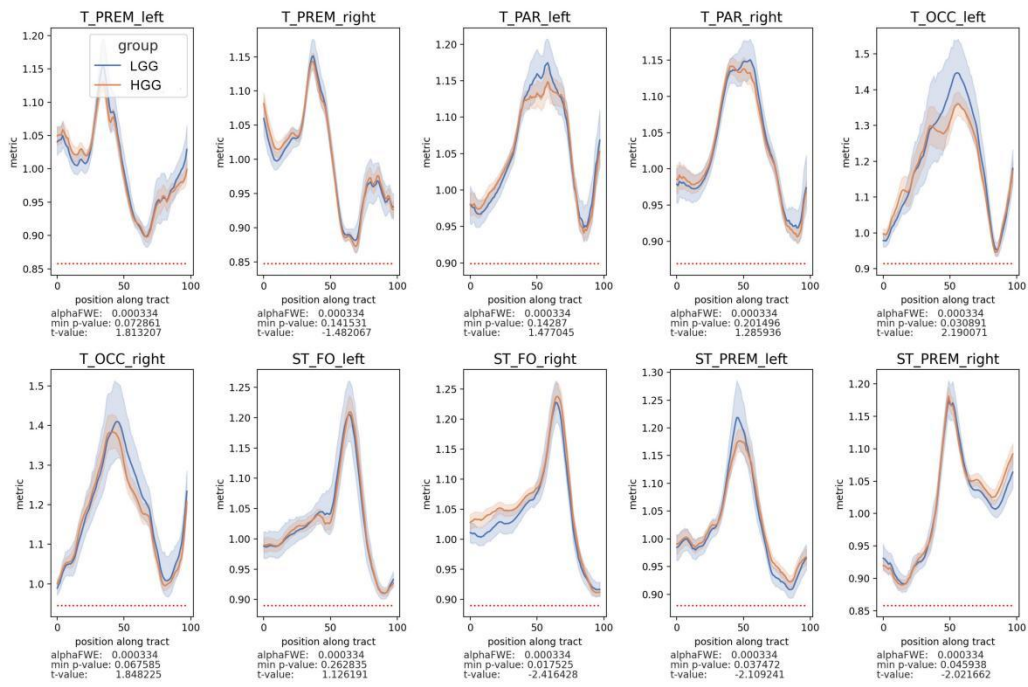

**Supplementary Figure 10.** Quantitative analysis of MD values of fifty white matter tracts in patients with LGG versus patients with HGG.

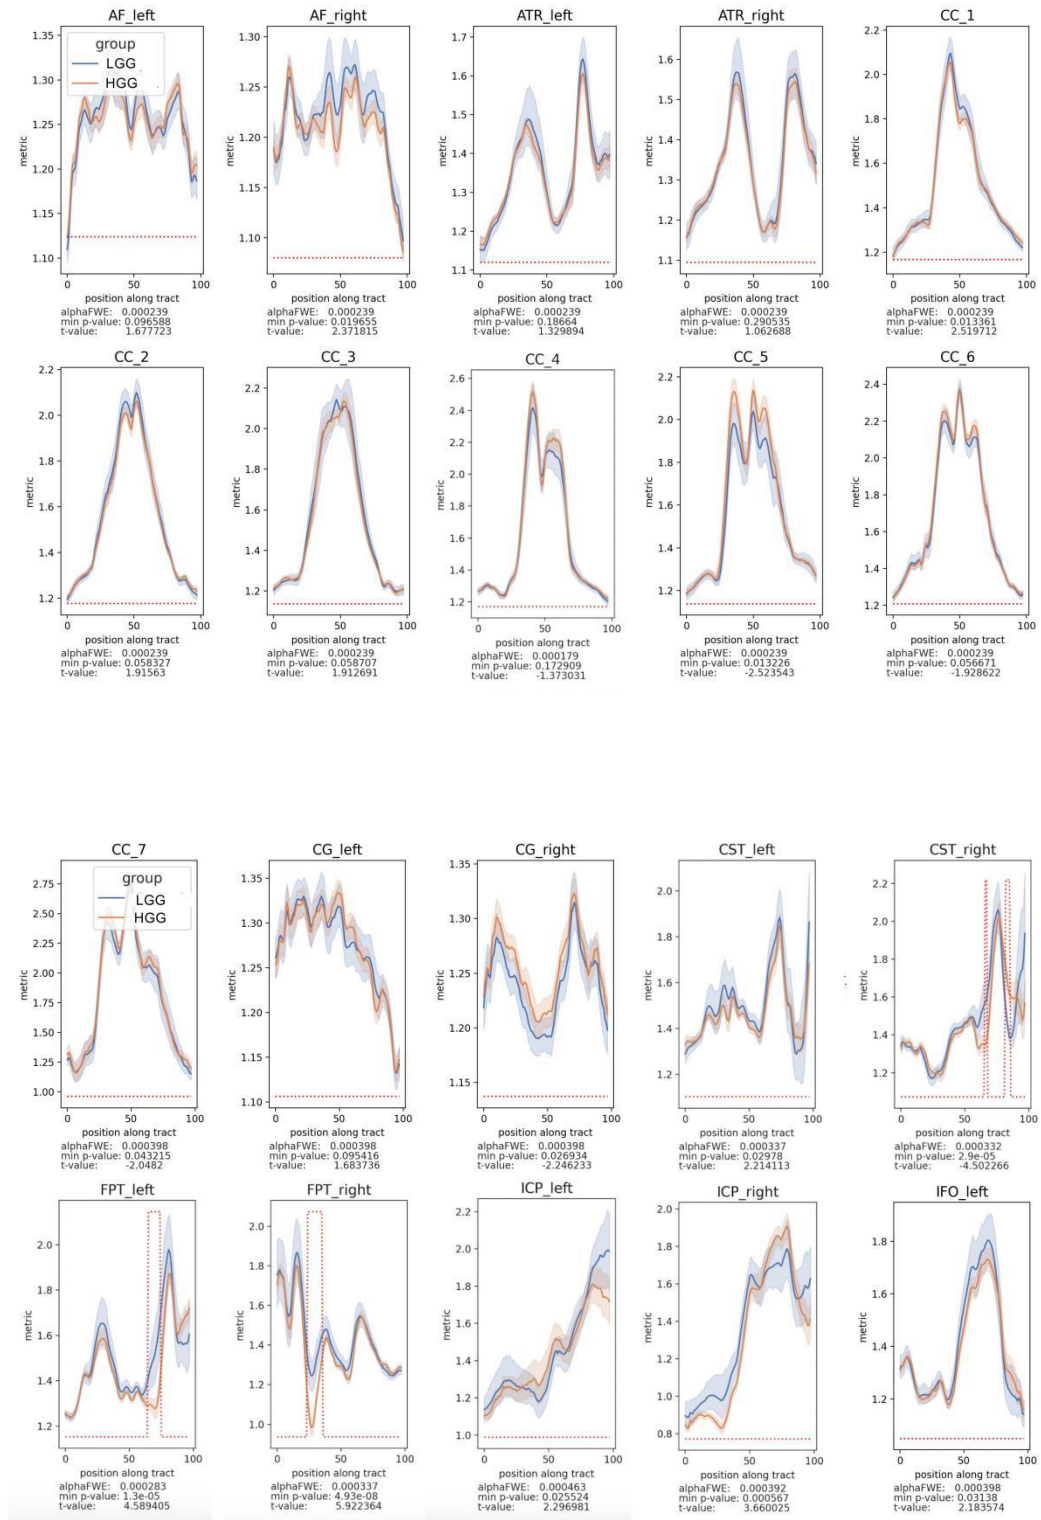

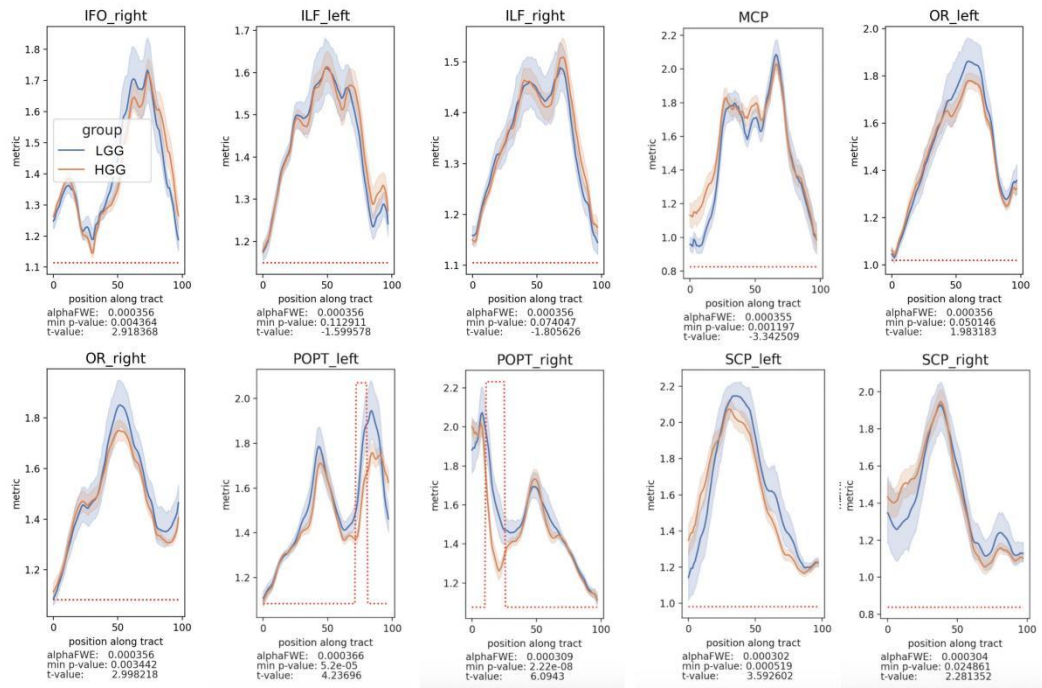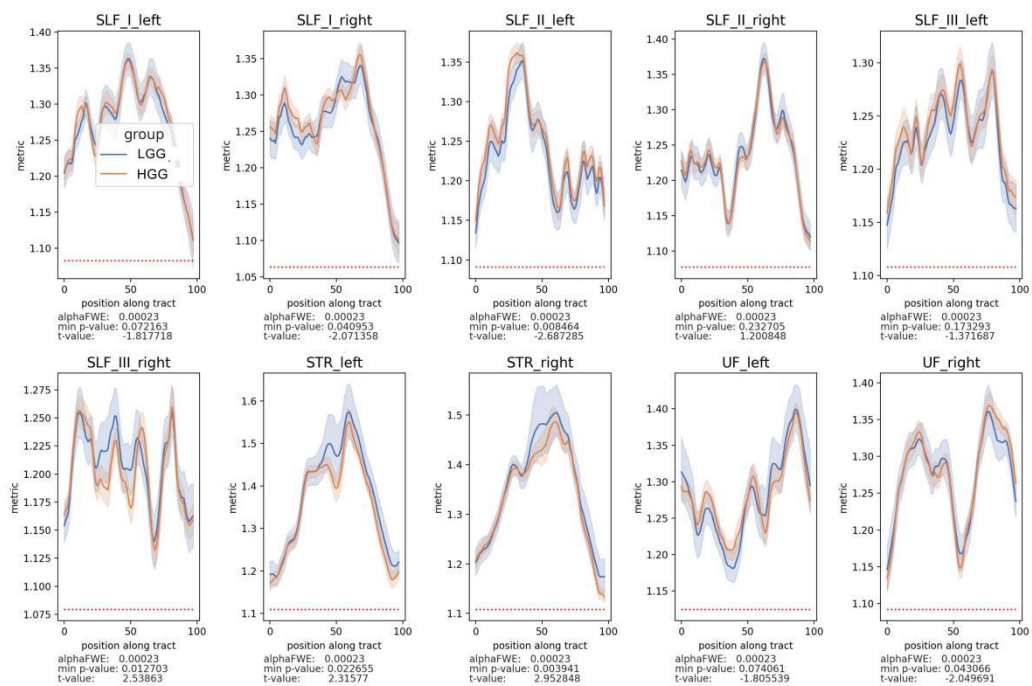



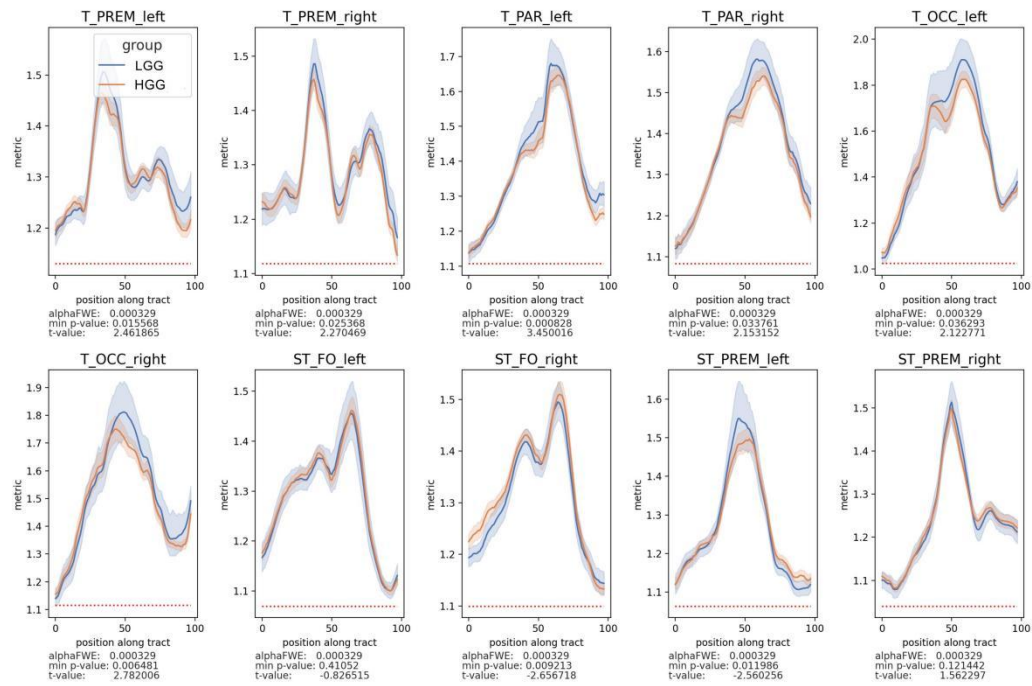

**Supplementary Figure 11.** Quantitative analysis of AD values of fifty white matter tracts in patients with LGG versus patients with HGG.

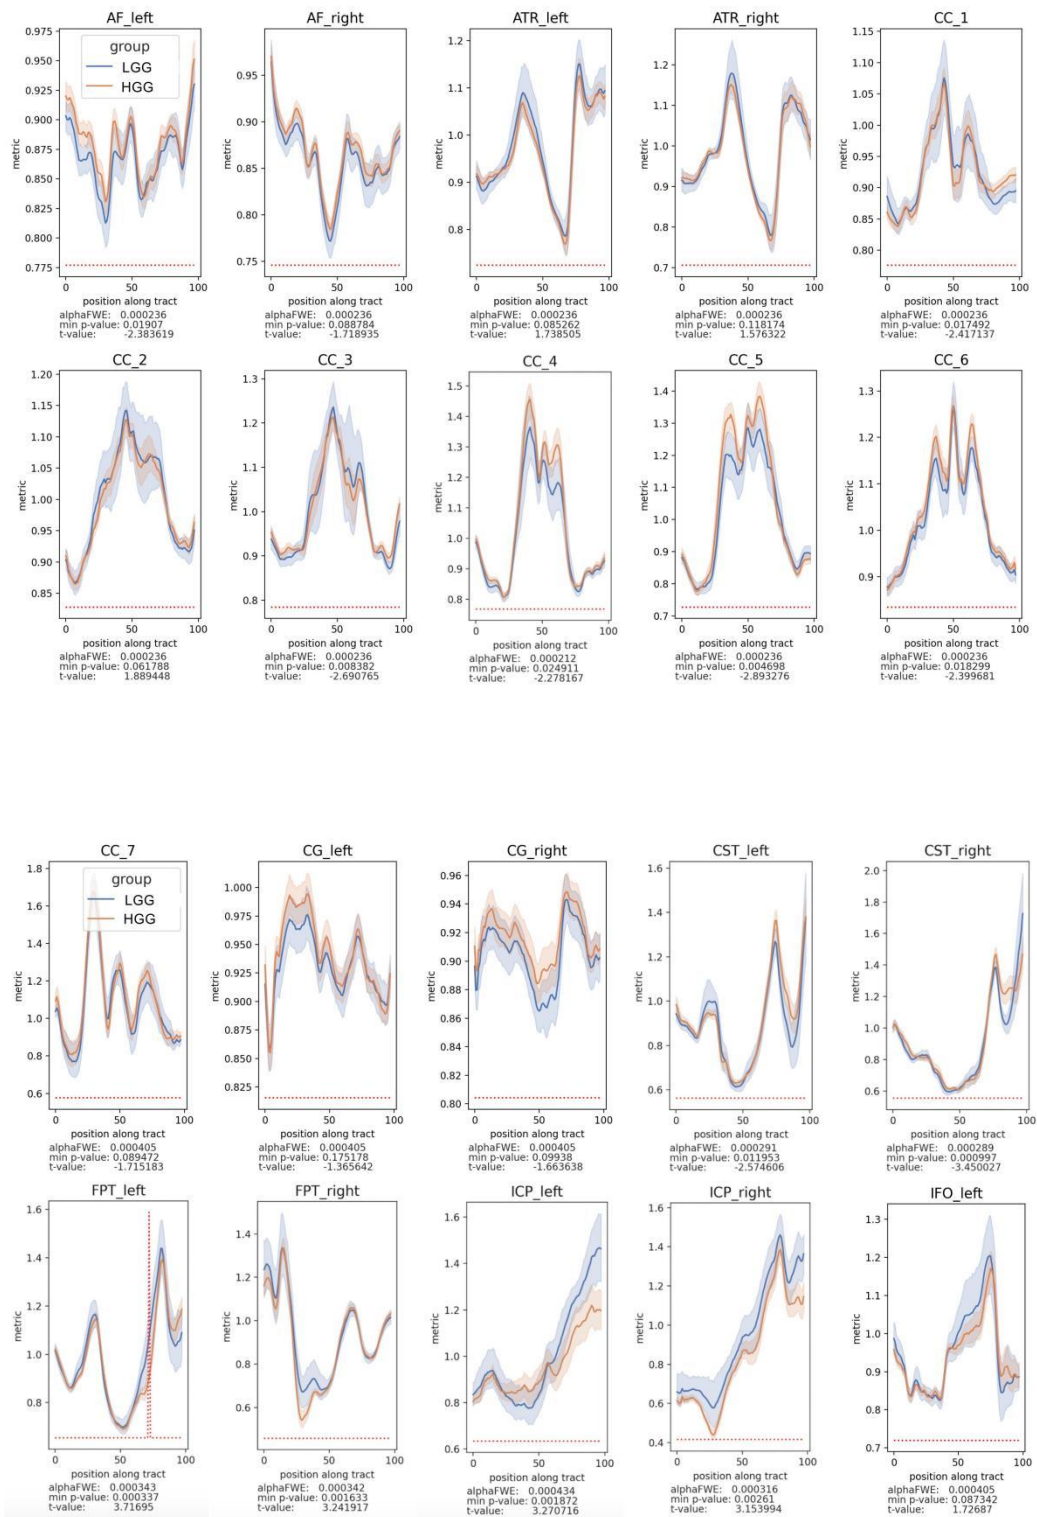

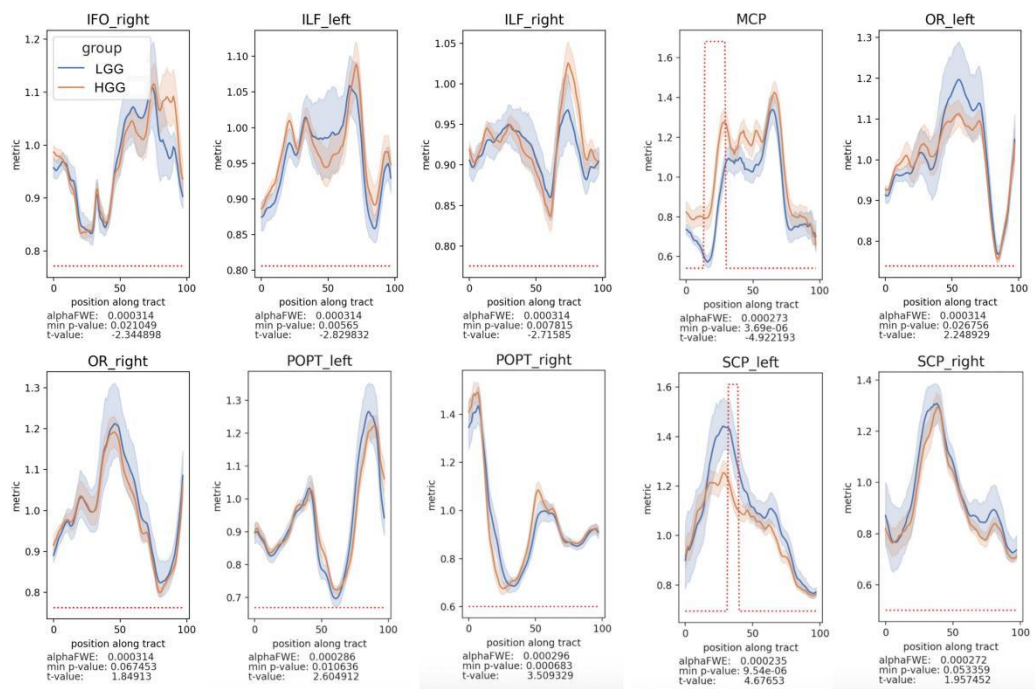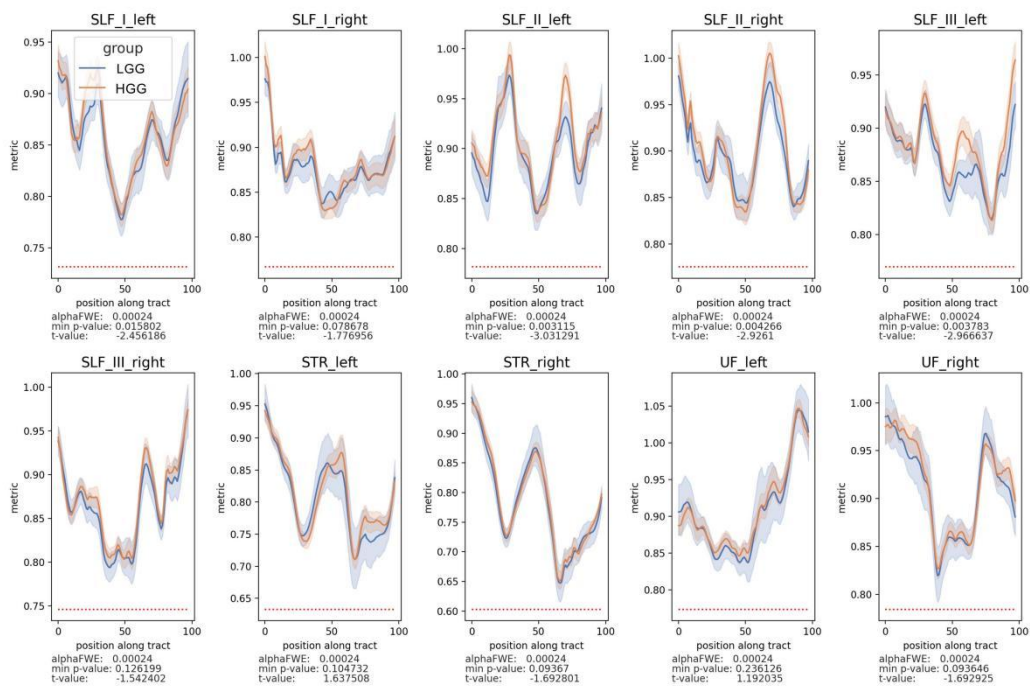

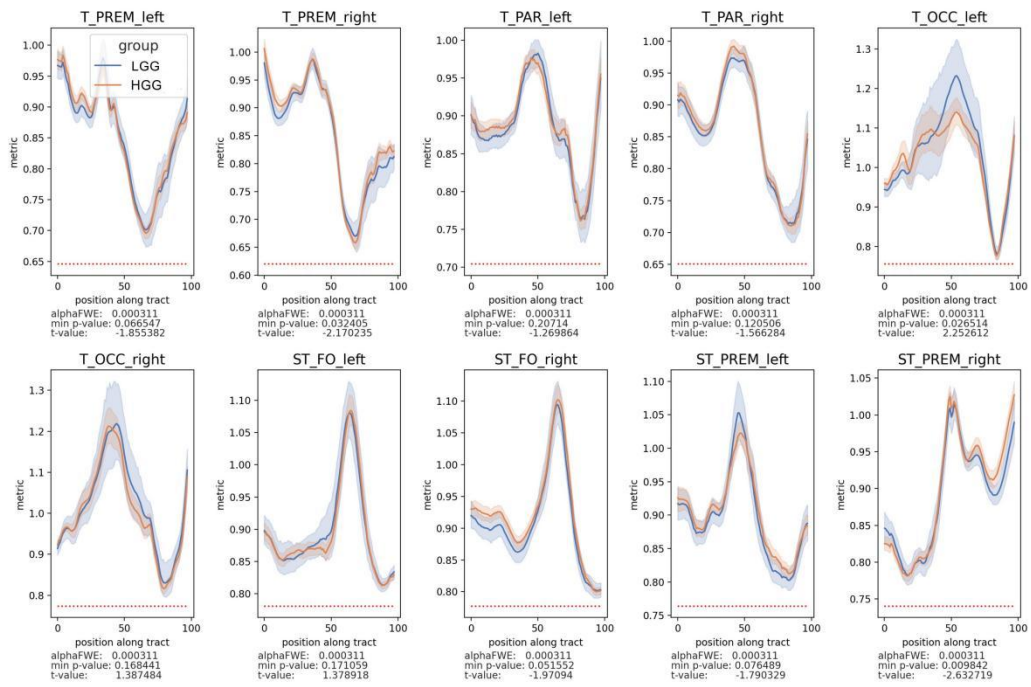

**Supplementary Figure 12.** Quantitative analysis of RD values of fifty white matter tracts in patients with LGG versus patients with HGG.



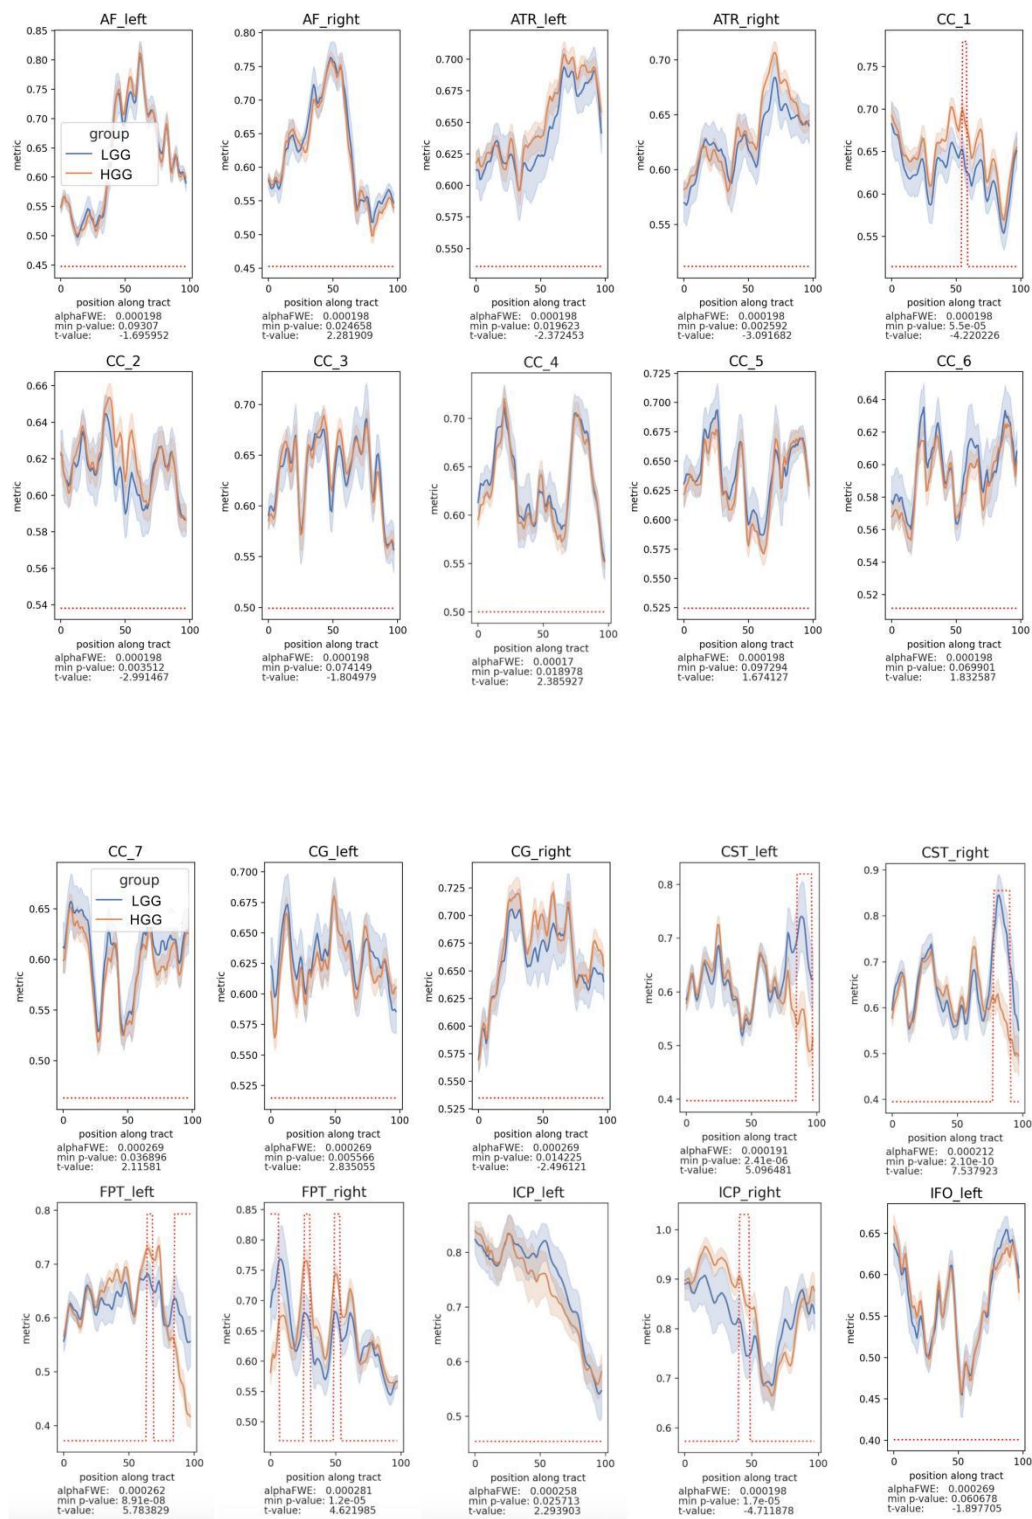

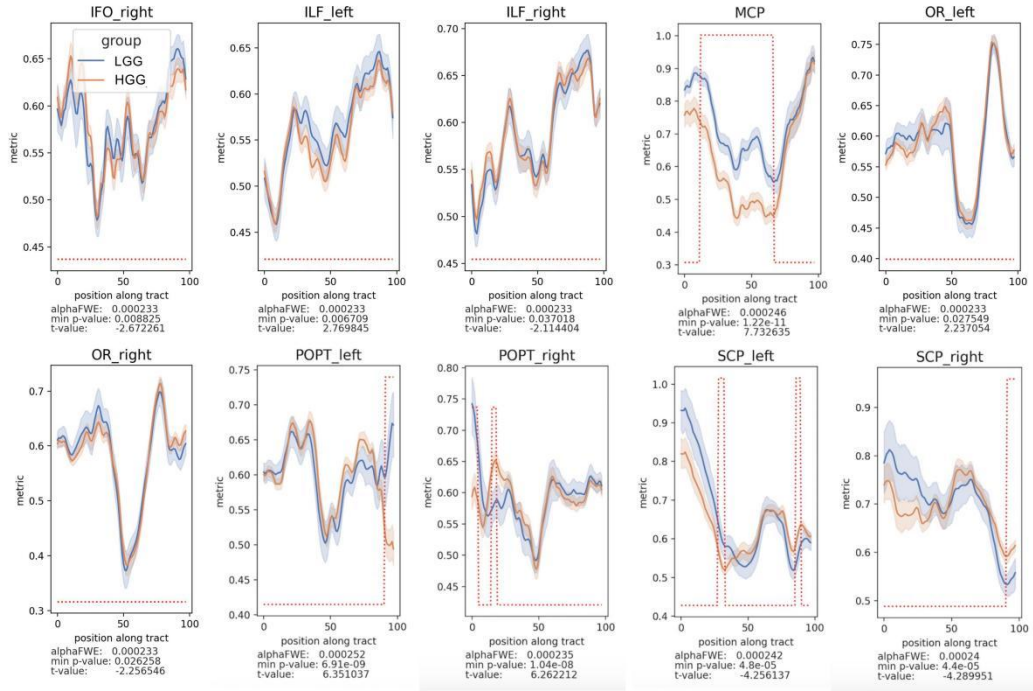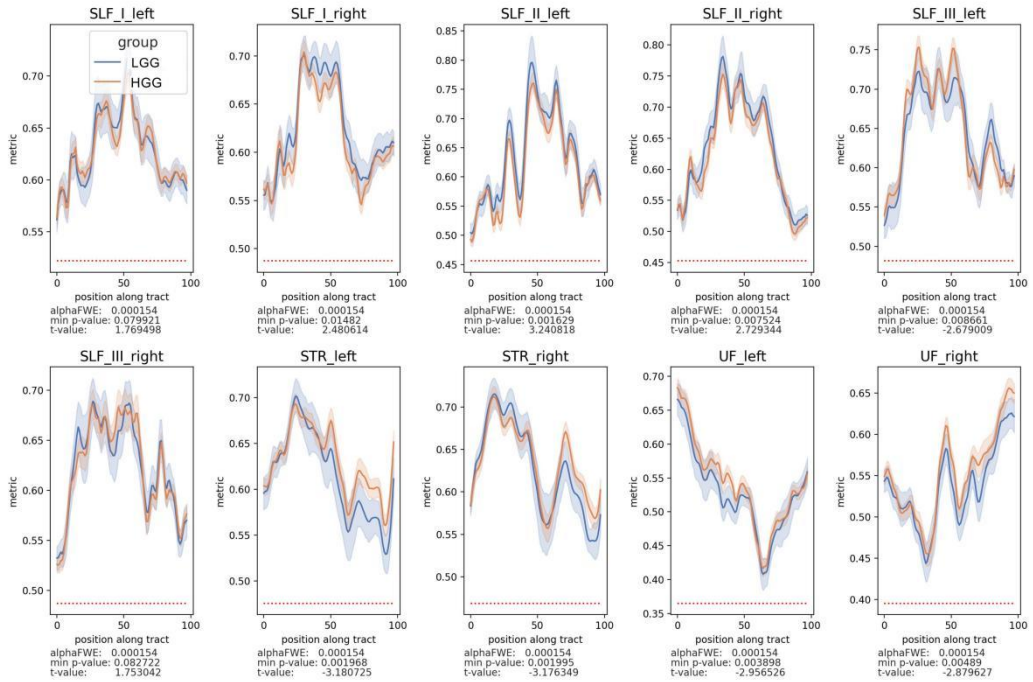

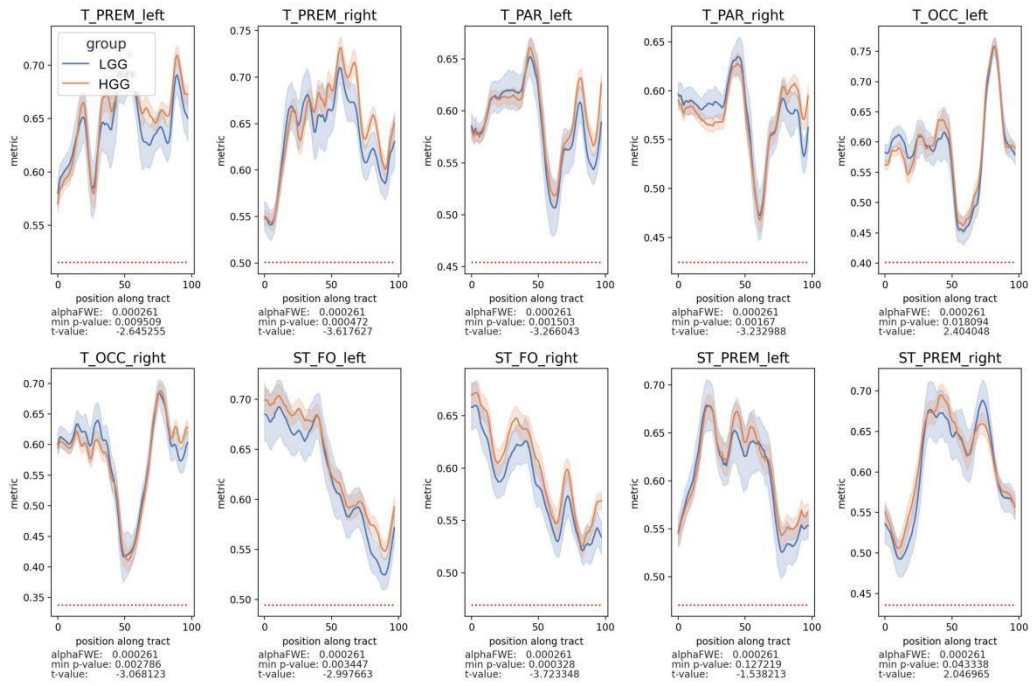

**Supplementary Figure 13.** Quantitative analysis of AK values of fifty white matter tracts in patients with LGG versus patients with HGG.

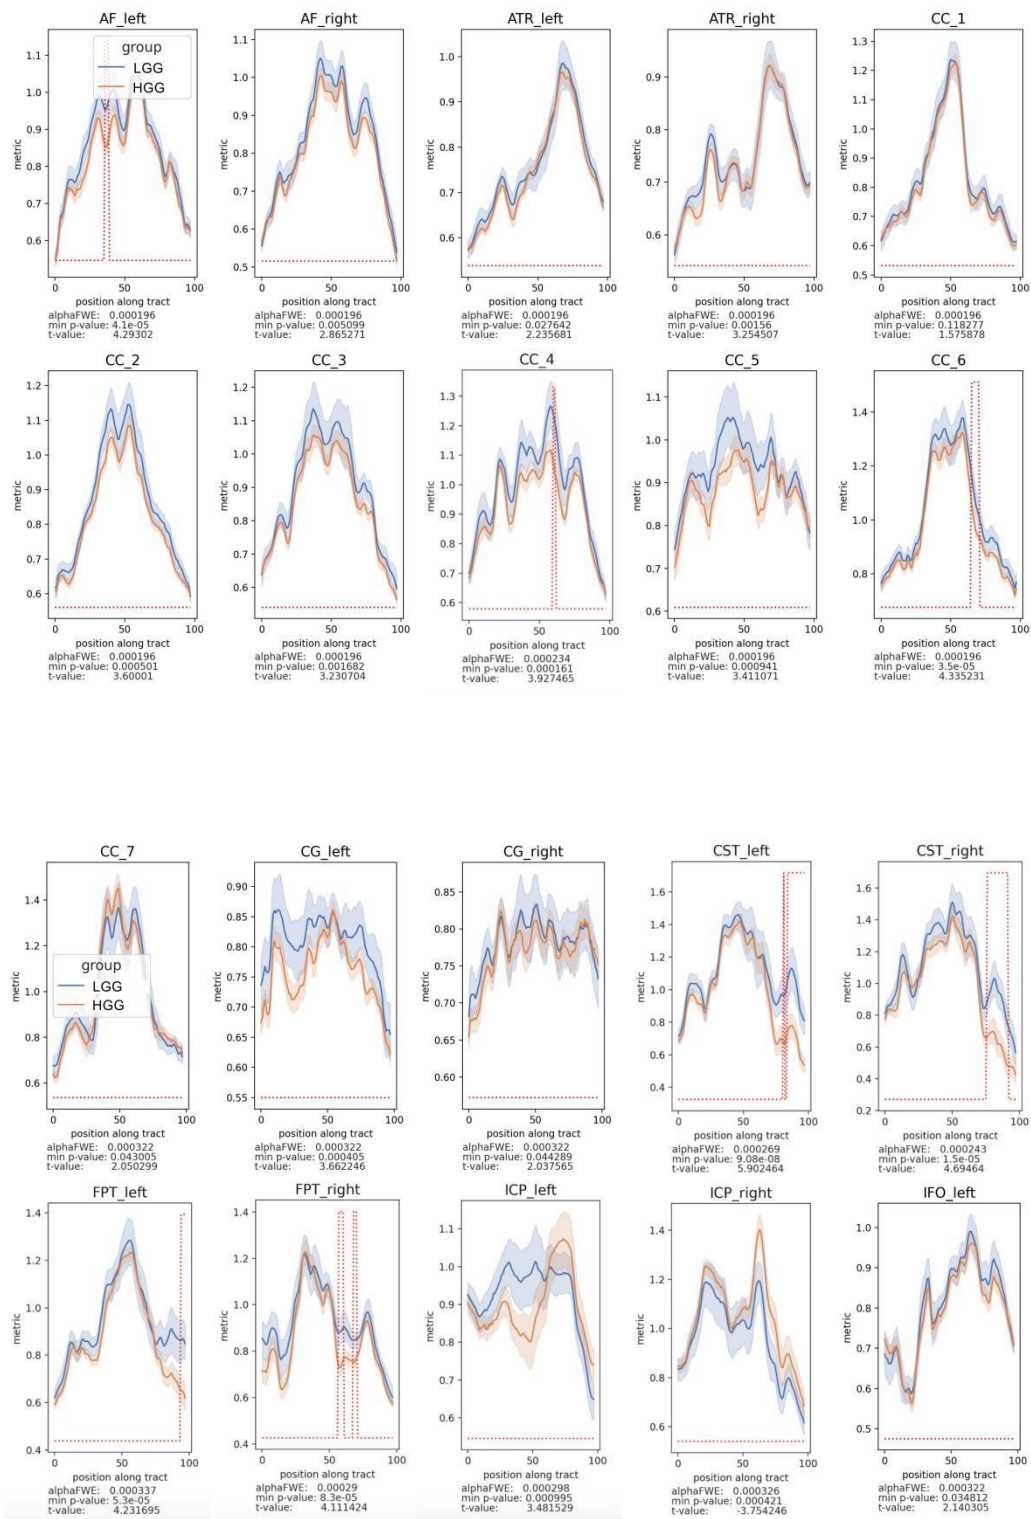



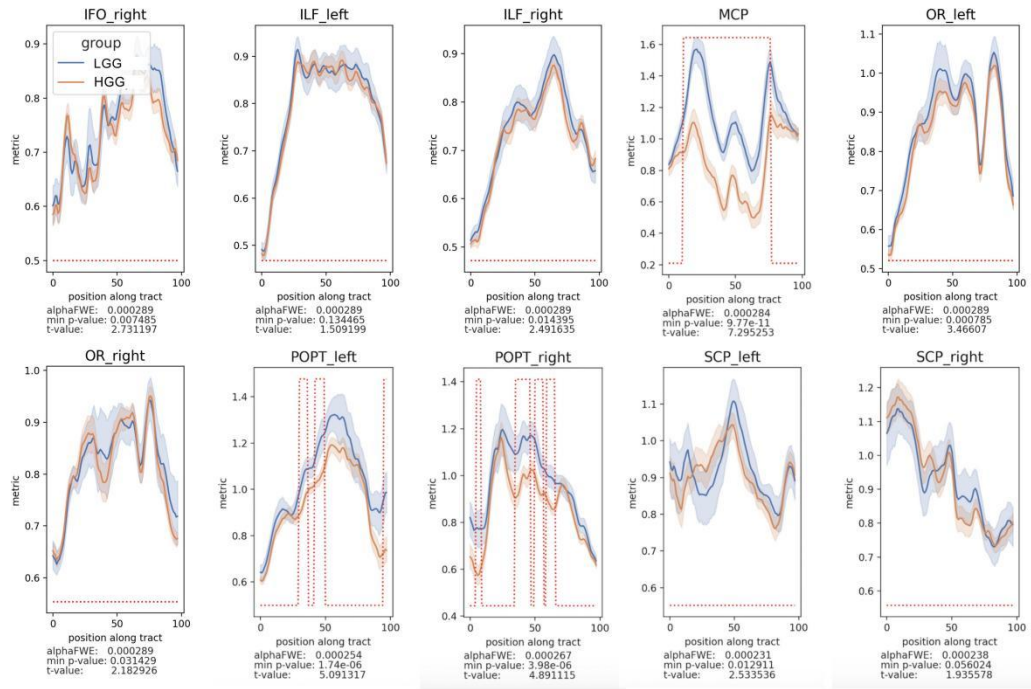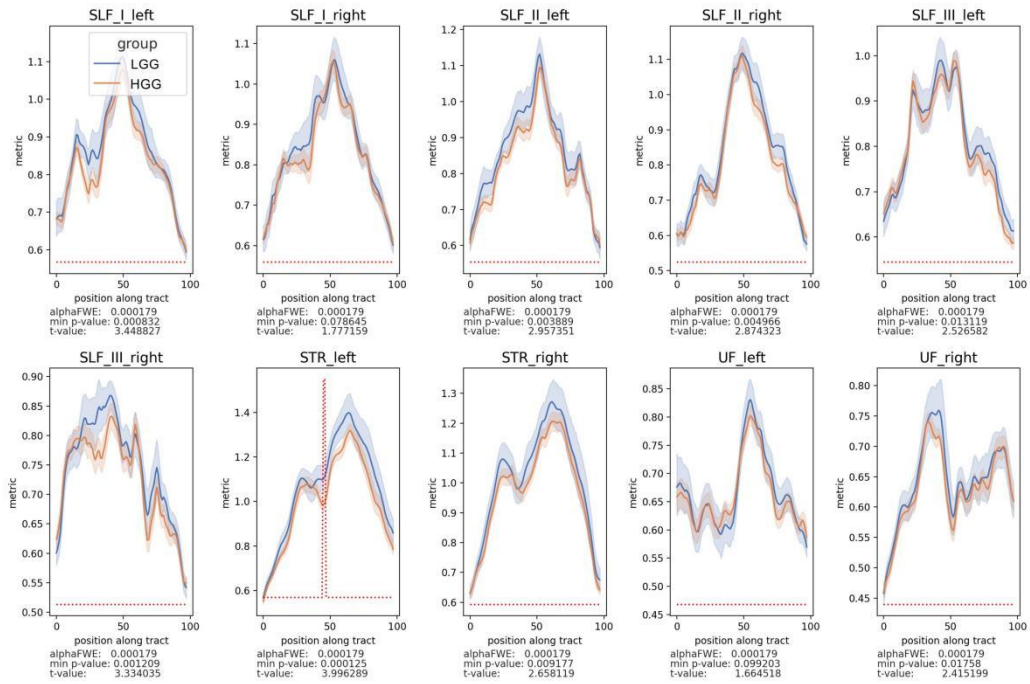

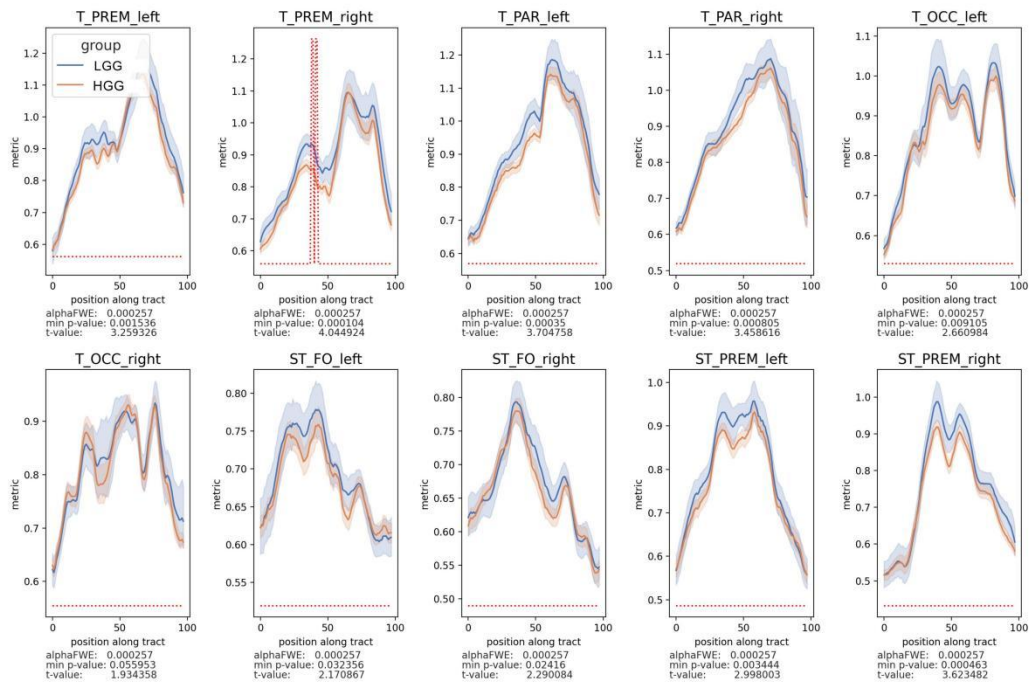

**Supplementary Figure 14.** Quantitative analysis of RK values of fifty white matter tracts in patients with LGG versus patients with HGG.

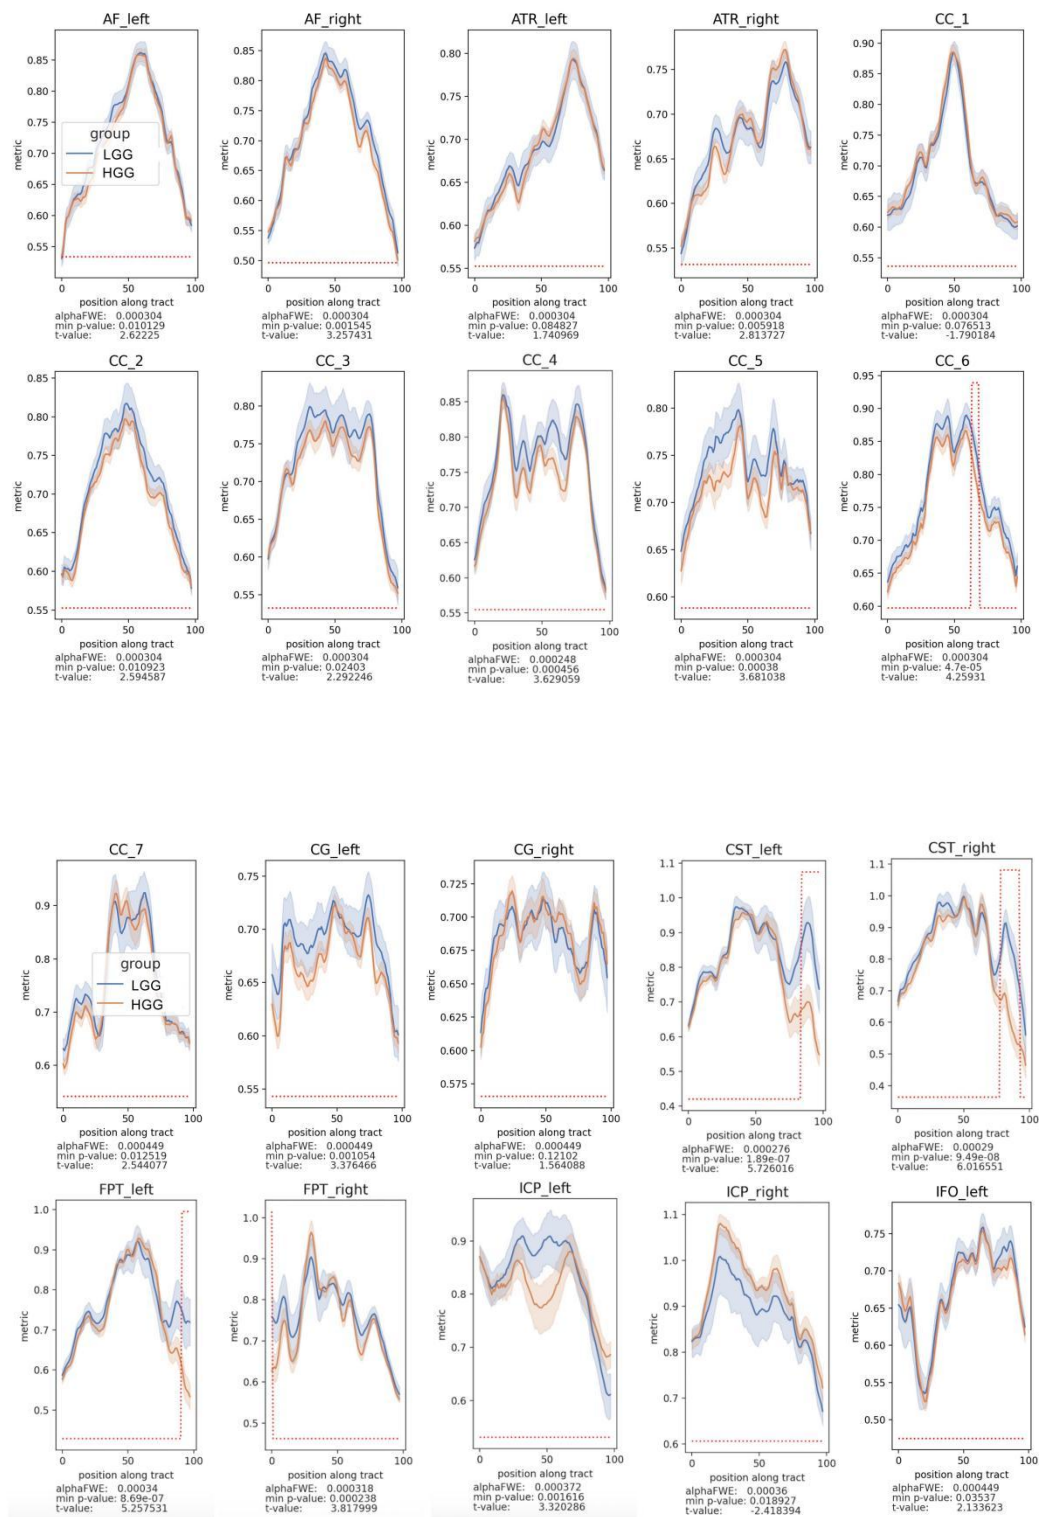

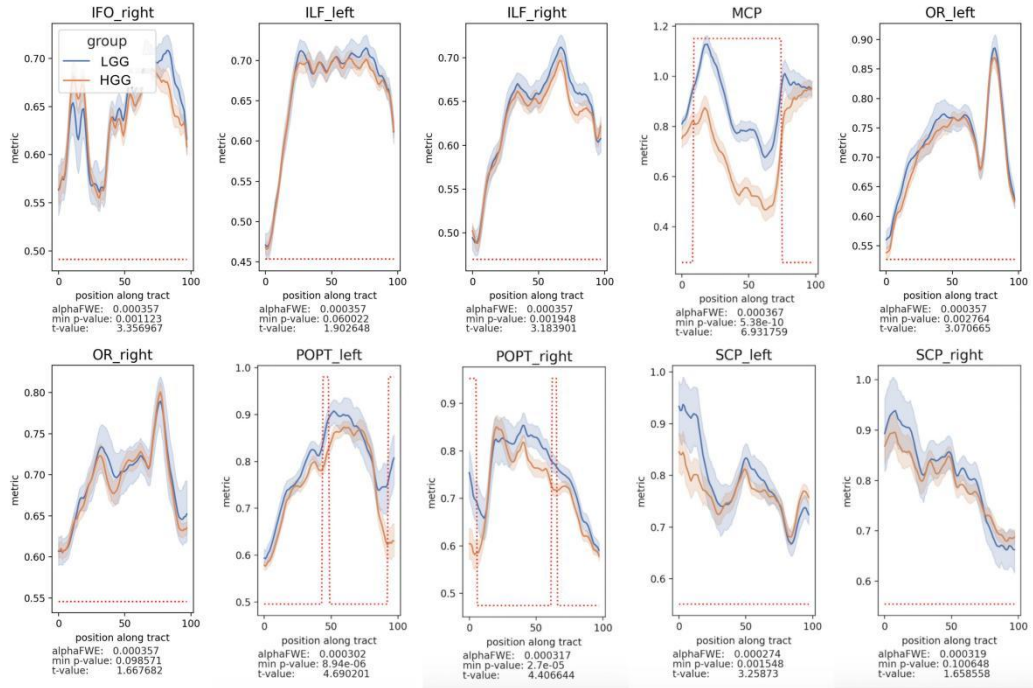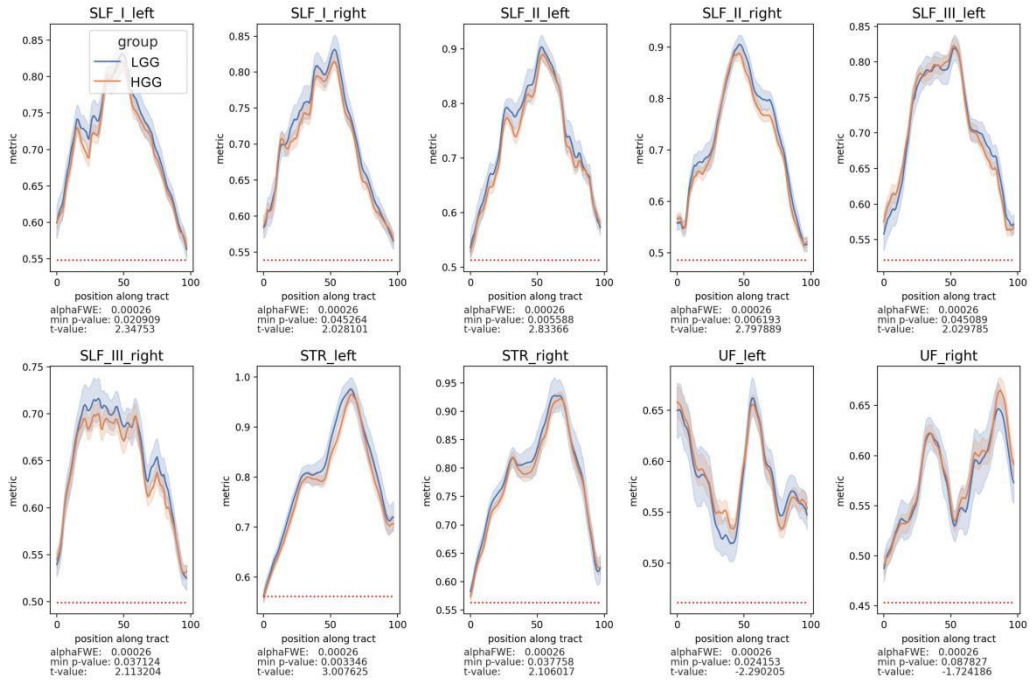



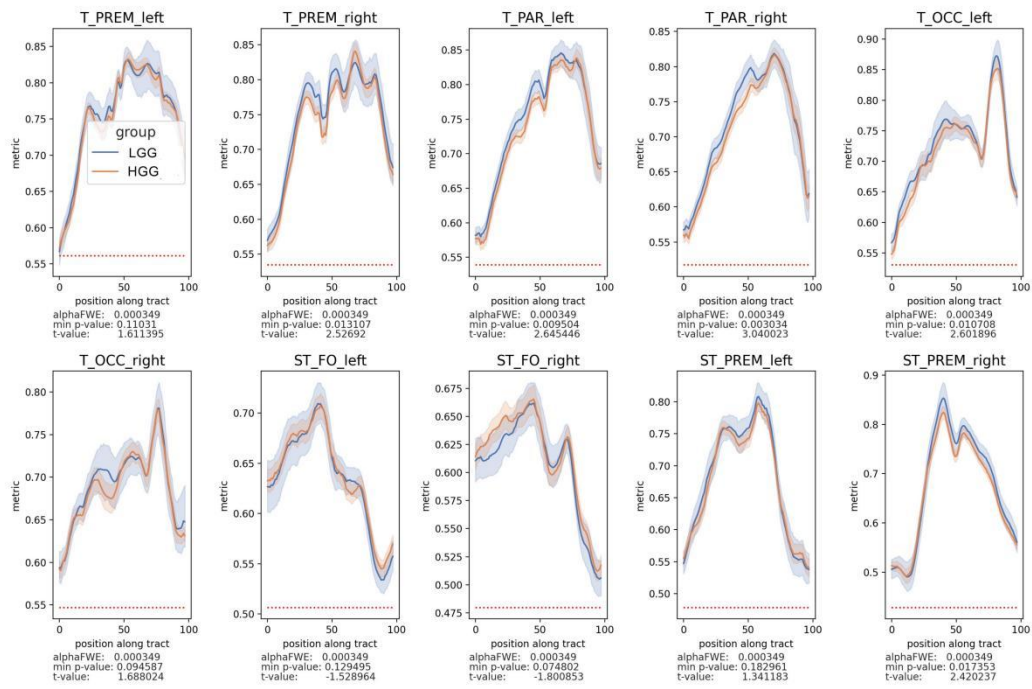

**Supplementary Figure 15.** Quantitative analysis of MK values of fifty white matter tracts in patients with LGG versus patients with HGG.

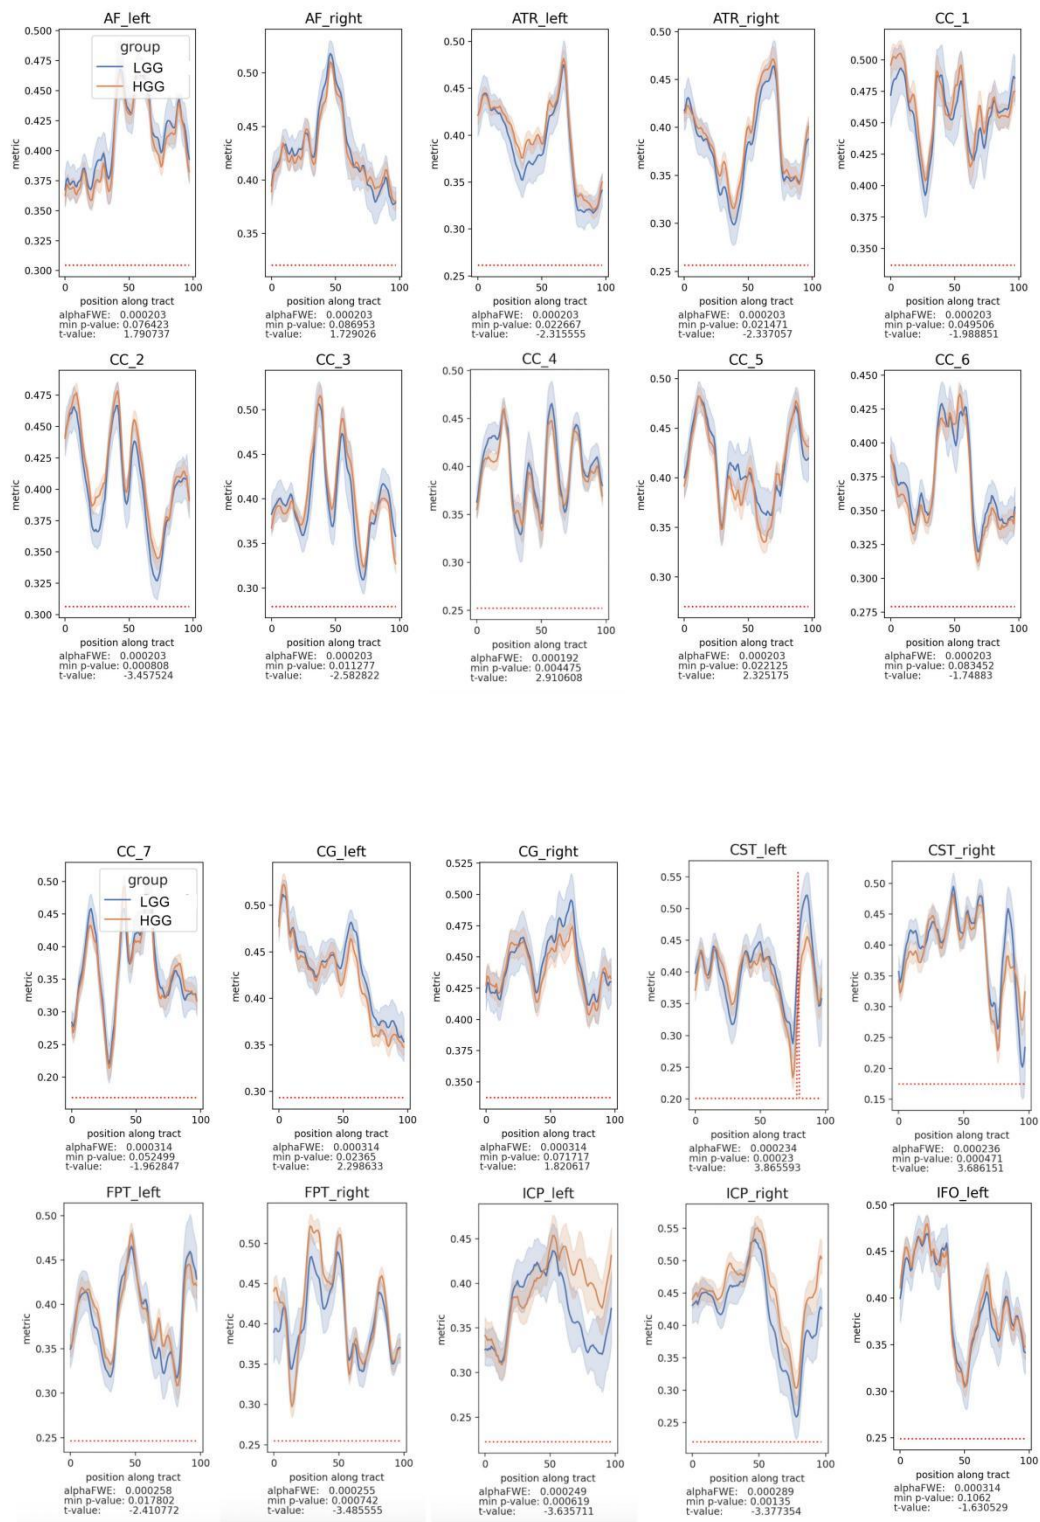

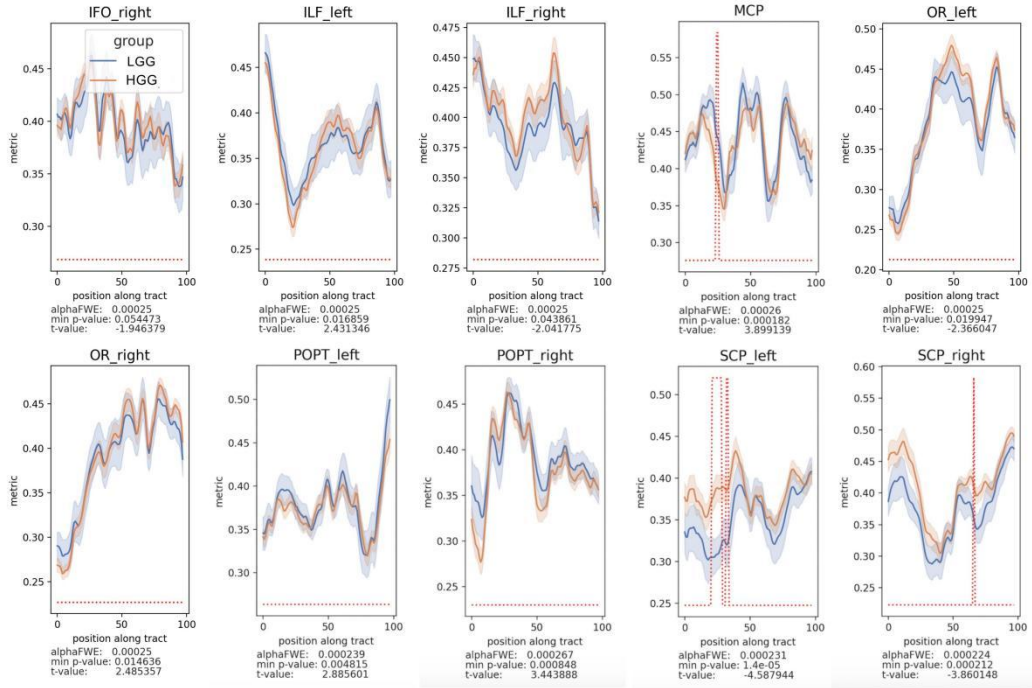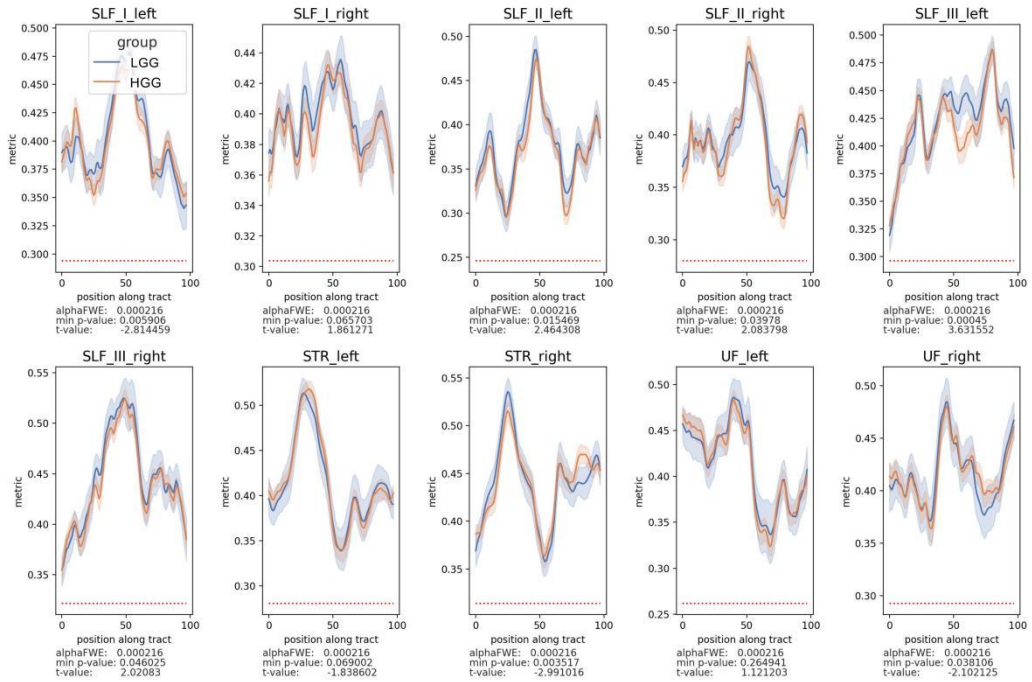

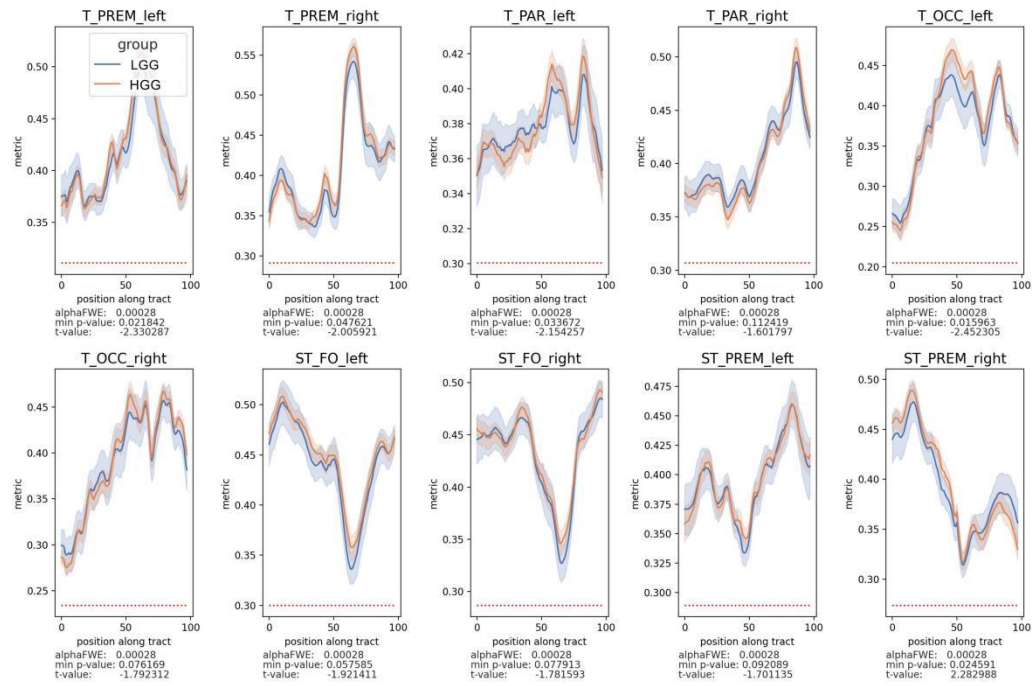

**Supplementary Figure 16.** Quantitative analysis of Fak values of fifty white matter tracts in patients with LGG versus patients with HGG.
